# Supplementary material for: The mechanism of copper-catalyzed oxytrifluoromethylation of allylamines with CO2: a computational study
Source: Royal Society of Chemistry journal article supplement (doi:10.1039/c7qo00838d), 2017-11-07
Supplement: c7qo00838d1.pdf [file c7qo00838d1.pdf]

# Electronic Supplementary Information

## On the Mechanism of Copper-Catalyzed Oxytrifluoromethylation of Allylamines with CO<sub>2</sub>: A Computational Study

Lei Zhu<sup>a</sup>, Jian-Heng Ye<sup>b</sup>, Meng Duan<sup>a</sup>, Xiaotian Qi<sup>b</sup>, Da-Gang Yu<sup>\*b</sup>, Ruopeng Bai<sup>\*a</sup>  
and Yu Lan<sup>\*a</sup>

<sup>a</sup>School of Chemistry and Chemical Engineering, Chongqing University, Chongqing,  
China.

<sup>b</sup>Key Laboratory of Green Chemistry & Technology of Ministry of Education,  
College of Chemistry, Sichuan University, Chengdu, China.

*dgyu@scu.edu.cn, ruopeng@cqu.edu.cn, lanyu@cqu.edu.cn*

### Table of contents

|                                                                                 |     |
|---------------------------------------------------------------------------------|-----|
| 1. Complete Reference for Gaussian 09 .....                                     | S1  |
| 2. Test for Stability of Wavefunction .....                                     | S2  |
| 3. Discussion for Competitive Mechanisms .....                                  | S3  |
| 4. Benchmark for Different DFT Methods .....                                    | S6  |
| 5. Absolute Calculation Energies, Enthalpies, and Free Energies .....           | S8  |
| 6. B3-LYP Geometries for All the Optimized Compounds and Transition State ..... | S10 |

### 1. Complete Reference for Gaussian 09

Gaussian 09, Revision D.01, Frisch, M. J.; Trucks, G. W.; Schlegel, H. B.; Scuseria, G. E.; Robb, M. A.; Cheeseman, J. R.; Scalmani, G.; Barone, V.; Mennucci, B.;

Petersson, G. A.; Nakatsuji, H.; Caricato, M.; Li, X.; Hratchian, H. P.; Izmaylov, A. F.; Bloino, J.; Zheng, G.; Sonnenberg, J. L.; Hada, M.; Ehara, M.; Toyota, K.; Fukuda, R.; Hasegawa, J.; Ishida, M.; Nakajima, T.; Honda, Y.; Kitao, O.; Nakai, H.; Vreven, T.; Montgomery, Jr., J. A.; Peralta, J. E.; Ogliaro, F.; Bearpark, M.; Heyd, J. J.; Brothers, E.; Kudin, K. N.; Staroverov, V. N.; Kobayashi, R.; Normand, J.; Raghavachari, K.; Rendell, A.; Burant, J. C.; Iyengar, S. S.; Tomasi, J.; Cossi, M.; Rega, N.; Millam, N. J.; Klene, M.; Knox, J. E.; Cross, J. B.; Bakken, V.; Adamo, C.; Jaramillo, J.; Gomperts, R.; Stratmann, R. E.; Yazyev, O.; Austin, A. J.; Cammi, R.; Pomelli, C.; Ochterski, J. W.; Martin, R. L.; Morokuma, K.; Zakrzewski, V. G.; Voth, G. A.; Salvador, P.; Dannenberg, J. J.; Dapprich, S.; Daniels, A. D.; Farkas, Ö.; Foresman, J. B.; Ortiz, J. V.; Cioslowski, J.; Fox, D. J. Gaussian, Inc., Wallingford CT, 2013.

## 2. Test for Stability of Wavefunction

In this multi-spin state system, test for the stability of the wavefunction was absolutely necessary. Before the calculation, we had tested the stability of the wavefunction with singlet, doublet, and triplet state intermediates. The test was conducted with B3-LYP/6-31(d) (SDD for Cu and I) level. All the test results confirmed that the wavefunction is stable under the perturbations considered. As:

```
The wavefunction is stable under the perturbations considered.  
The wavefunction is already stable.
```

```
*****
```

### 3. Discussion for Competitive Mechanisms

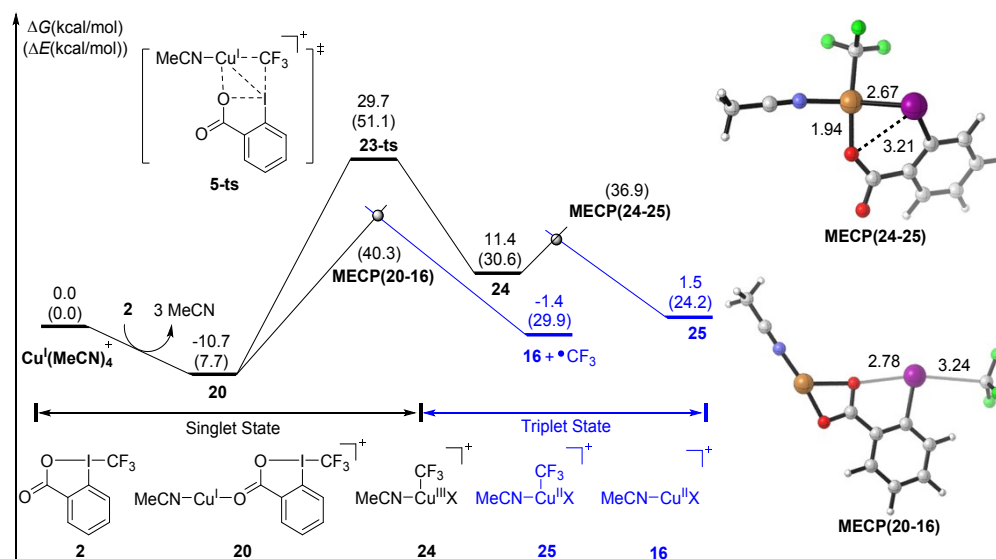

**Fig. S1.** Energy profiles for oxidation and free radical initiation of the cationic Cu(I) complex. The relative free energies ( $\Delta G$ ) and relative electronic energies ( $\Delta E$ , in parentheses) in acetonitrile are given in kcal/mol. The bond distances are in angstroms. (X = 2-iodobenzoate)

Because we are using the  $[\text{Cu}(\text{MeCN})_4] \text{PF}_6$  catalyst, we initially considered activation of Togni reagent II in the cationic Cu(I) complex, and the calculated energy profiles are summarized in Fig. S1. After ligand exchange, intermediate **20** forms with a free energy decrease of 10.7 kcal/mol. Subsequent oxidative addition of intermediate **20** proceeds via transition state **23-ts** with a free energy barrier of 41.4 kcal/mol to give the singlet state Cu(III) species **24**. The relative free energy of intermediate **24** is 22.1 kcal/mol higher than that of **20**. Then the triplet Cu(II) complex **25** was generated via the minimum energy crossing point (**MECP(24-25)**) with an activation energy of 6.3 kcal/mol. The calculated results indicate that the oxidization pathway is unfavorable in this system both thermodynamically and kinetically. Meanwhile, cationic Cu(I) mediated I- $\text{CF}_3$  bond homo-cleavage was also investigated. This cleavage walks along the singlet state potential energy surface via **MECP(20-16)** with an electronic energy ( $\Delta E$ ) barrier of 32.6 kcal/mol and concomitant generation of free radical  $\text{CF}_3\cdot$  and Cu(II) **16**. Structural analysis of

**MECP(20–16)** show that the bond lengths of O–I and I–CF<sub>3</sub> are 2.78 and 3.24 Å, respectively, which indicates simultaneous cleavage of the O–I and I–CF<sub>3</sub> bonds. Although the corresponding relative electronic energy of **MECP(20–16)** is 10.8 kcal/mol lower than that of **23-ts**, homo cleavage of the I–CF<sub>3</sub> bond in the cationic Cu(I) complex at room temperature can be excluded.

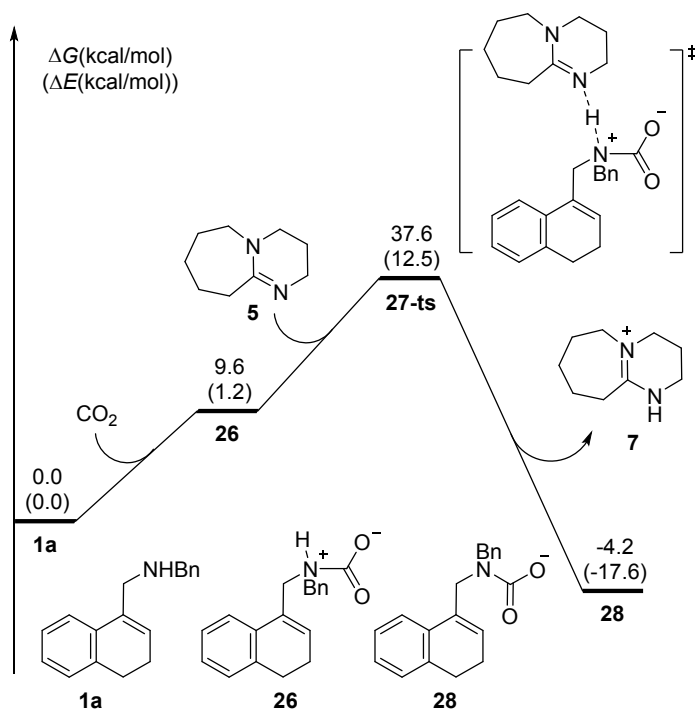

**Fig. S2.** Free energy profile for deprotonation of allylamines and CO<sub>2</sub> activation. The relative free energies ( $\Delta G$ ) and relative electronic energies ( $\Delta E$ , in parentheses) in acetonitrile are given in kcal/mol.

As depicted in Fig. S2, we also investigated deprotonation and CO<sub>2</sub> activation without assistance of copper catalysts. The combination of allylamines **1a** and CO<sub>2</sub> leads to generation of a zwitterion intermediate **26**, which is endergonic by 9.6 kcal/mol. Subsequently, the formed zwitterion intermediate **16** undergoes deprotonation by DBU (1,8-diazabicyclo[5.4.0]undec-7-ene), thereby resulting in formation of carbamate intermediate **28**. The overall of this process is up to 37.6 kcal/mol, which indicates that the CO<sub>2</sub> activation by allylamines is unfavorable in this case. Comparing with the pathway in Fig. 2, these results suggest that allylamine and CO<sub>2</sub> exhibit enhanced reactivity in presence of copper catalysts.

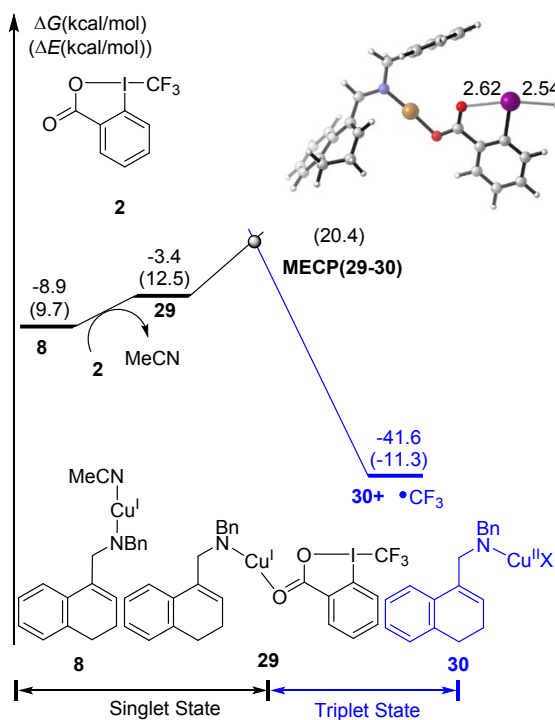

**Fig. S3.** Free energy profile for  $\text{CF}_3\cdot$  initiation in the copper amino species. The relative free energies ( $\Delta G$ ) and relative electronic energies ( $\Delta E$ , in parentheses) in acetonitrile are given in kcal/mol. The bond distances are in angstroms. ( $X = 2$ -iodobenzoate)

As shown in Fig. S3, after ligand exchange, generation of carbonyl coordinated intermediate **29** is endergonic by 2.8 kcal/mol. Subsequently, the  $\text{I}-\text{CF}_3$  bond homocleavage proceeds via **MECP(29-30)** to generate the free radical  $\text{CF}_3\cdot$  and cupric amide **30** with an electronic energy barrier of 7.9 kcal/mol. The relative electronic energy of **MECP(29-30)** is 10.5 kcal/mol higher than that of **9-ts**, which indicates that the  $\text{CO}_2$  insertion would preferentially occur in the copper amide species.

## 4. Benchmark for Different DFT Methods

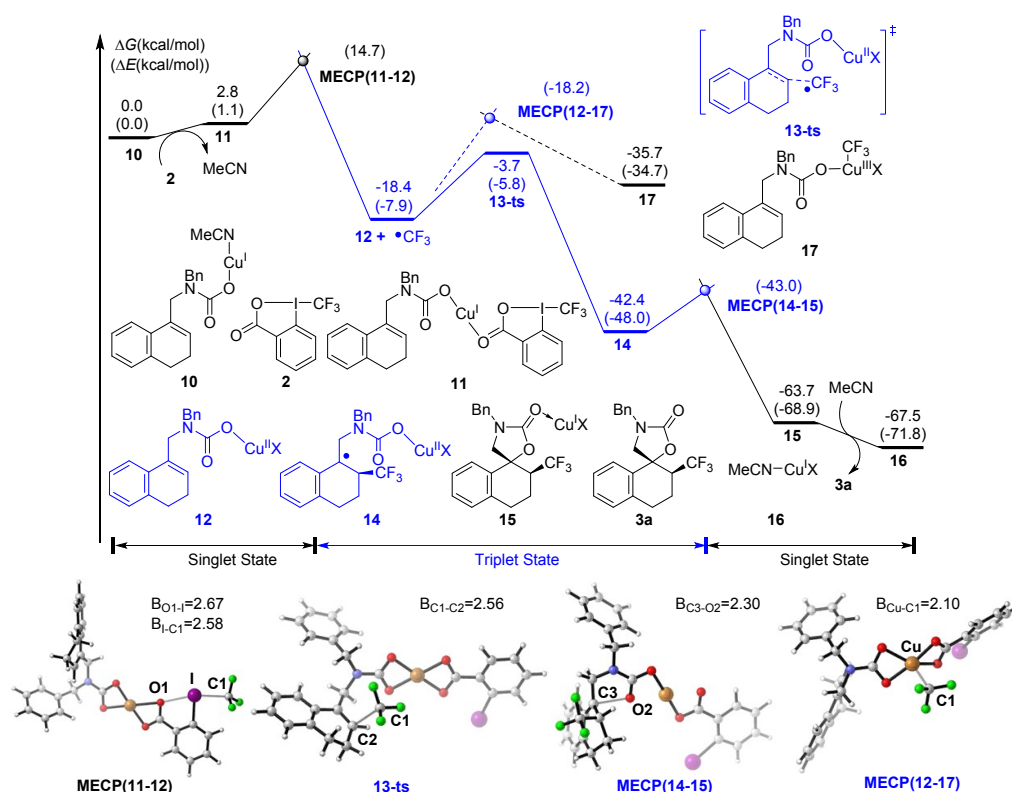

**Fig. S4.** B3LYP method calculated free energy profiles for the generation of 2-oxazolidone.

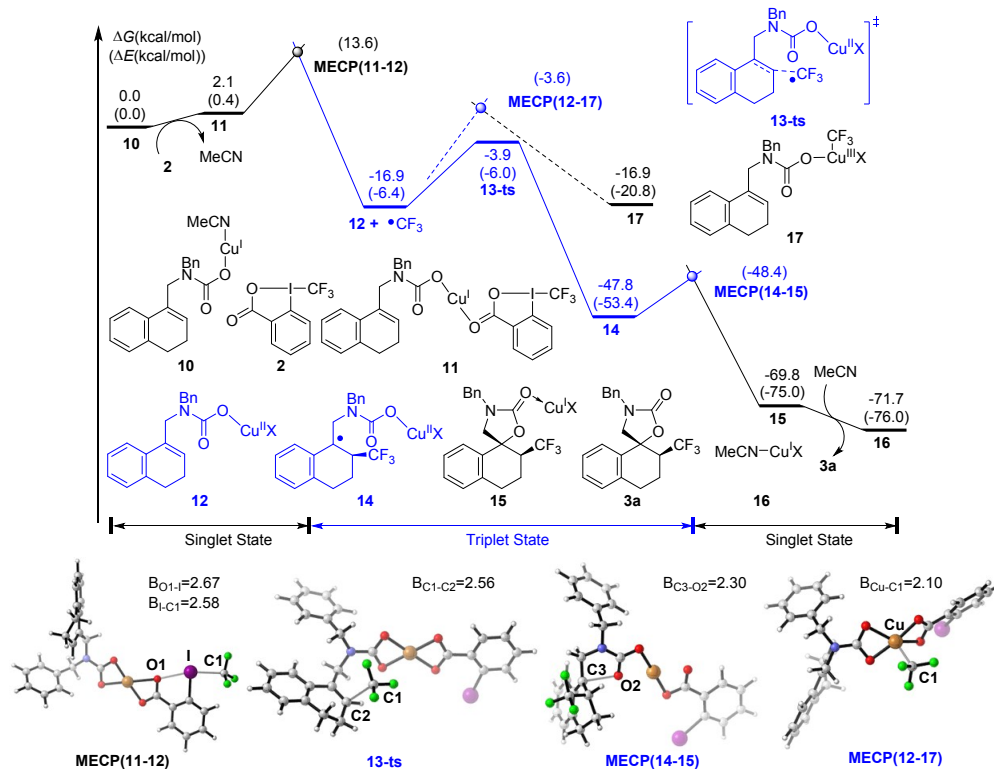

**Fig. S5.** B3LYP-D3 method calculated free energy profiles for the generation of 2-oxazolidone.

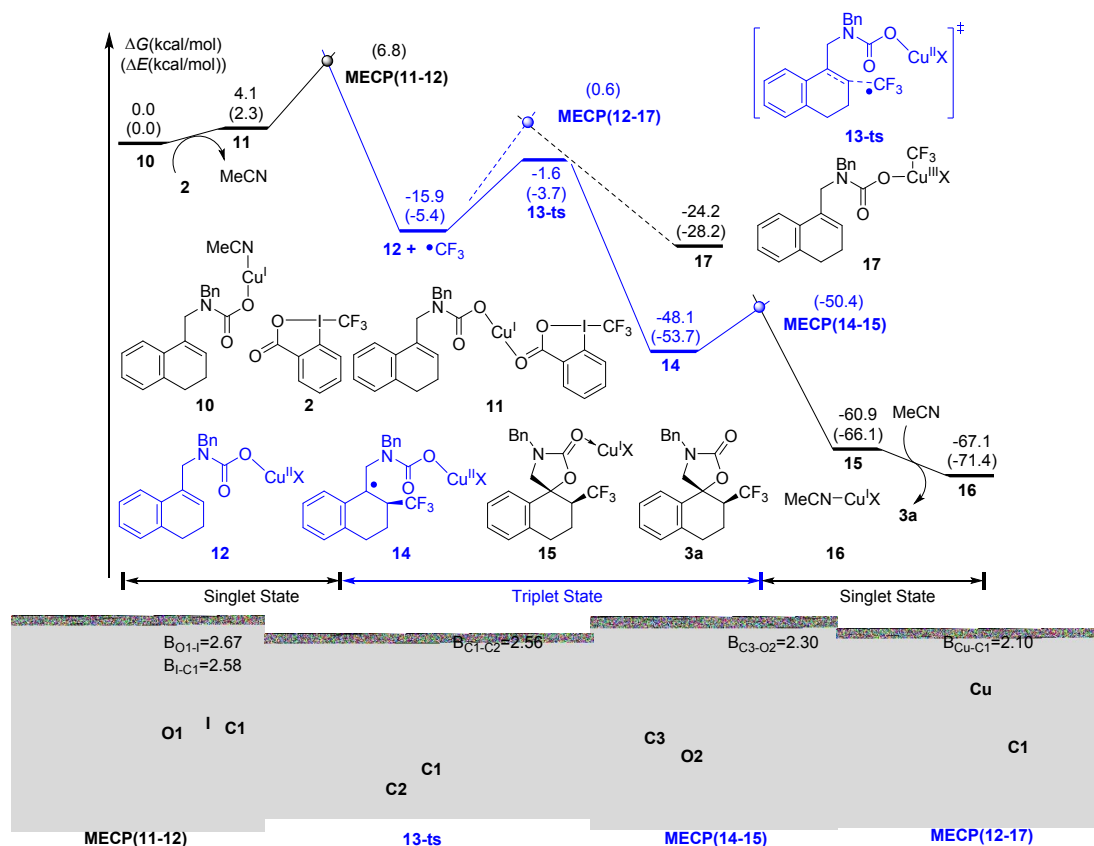

**Fig. S6.** B3LYP-D3 method calculated free energy profiles for the generation of 2-oxazolidone.

We have tested some other functionals, such as B3LYP-D3 and M06-L, which take the dispersion energy into consideration. As shown in the fig. S4-6, the computation results indicate that when different functionals are used to calculate the generation of 2-oxazolidone, the fluctuation tendency of free energy profiles is almost the same. All these calculated results proven that the radical addition process is more favorable than the oxidation. Therefore, the conclusion can be drawn as that the B3-LYP functional could provide great accuracy in energetic information for this work and the utilization of other functionals will not affect the overall conclusions on which is the preferred pathway. What's more, the B3-LYP results are in good agreement with the experiment.

## 5. Absolute Calculation Energies, Enthalpies, and Free Energies

**Table S1** B3-LYP calculated energies, enthalpies, and free energies.

| Geometry                   | $E_{(\text{elec-B3LYP})}^1$ | $G_{(\text{corr-B3LYP})}^2$ | $H_{(\text{corr-B3LYP})}^3$ | $E_{(\text{solv,B3LYP})}^4$ | IF <sup>5</sup> |
|----------------------------|-----------------------------|-----------------------------|-----------------------------|-----------------------------|-----------------|
| <b>MeCN</b>                | -132.7514859                | 0.022666                    | 0.050179                    | -132.8070662                | -               |
| <b>CO<sub>2</sub></b>      | -188.5775705                | -0.0091                     | 0.015204                    | -188.6506338                | -               |
| <b>CF<sub>3</sub>·</b>     | -337.5473784                | -0.01352                    | 0.016564                    | -337.6728114                | -               |
| <b>1a</b>                  | -752.0847807                | 0.281075                    | 0.343428                    | -752.3359381                | -               |
| <b>2</b>                   | -768.5267359                | 0.065327                    | 0.120424                    | -768.8046292                | -               |
| <b>4</b>                   | -1082.068373                | 0.318185                    | 0.4002                      | -1082.410712                | -               |
| <b>5</b>                   | -462.0786162                | 0.212259                    | 0.258055                    | -462.2343475                | -               |
| <b>6-ts</b>                | -1544.159763                | 0.549117                    | 0.656049                    | -1544.633538                | -144.59         |
| <b>7</b>                   | -462.4977364                | 0.226659                    | 0.273069                    | -462.7285636                | -               |
| <b>8</b>                   | -1081.618819                | 0.303153                    | 0.384689                    | -1081.908018                | -               |
| <b>9-ts</b>                | -1270.203564                | 0.312879                    | 0.400529                    | -1270.558264                | -133.78         |
| <b>10</b>                  | -1270.238397                | 0.315803                    | 0.404073                    | -1270.601965                | -               |
| <b>11</b>                  | -1906.015907                | 0.361228                    | 0.474562                    | -1906.597775                | -               |
| <b>MECP(11-12)</b>         | -1906.003416                |                             |                             | -1906.576115                | -               |
| <b>12</b>                  | -1568.501258                | 0.355249                    | 0.45658                     | -1568.93933                 | -               |
| <b>13-ts</b>               | -1906.056675                | 0.361798                    | 0.473801                    | -1906.608815                | -149.52         |
| <b>14</b>                  | -1906.121494                | 0.367402                    | 0.476396                    | -1906.676052                | -               |
| <b>MECP(14-15)</b>         | -1906.096575                |                             |                             | -1906.66805                 | -               |
| <b>MECP(14-15)<br/>iso</b> | -1906.09267169              |                             |                             | -1906.6612                  | -               |
| <b>15</b>                  | -1906.144936                | 0.366748                    | 0.478309                    | -1906.709349                | -               |
| <b>16</b>                  | -761.1870205                | 0.091993                    | 0.157589                    | -761.3798936                | -               |
| <b>MECP(12-17)</b>         | -1906.048941                |                             |                             | -1906.600604                | -               |
| <b>17</b>                  | -1906.072445                | 0.364741                    | 0.475289                    | -1906.626947                | -               |
| <b>18-ts</b>               | -1270.189176                | 0.320035                    | 0.401585                    | -1270.544793                | -202.52         |
| <b>19</b>                  | -1270.207257                | 0.319263                    | 0.403961                    | -1270.561237                | -               |



|                    |              |          |          |              |          |
|--------------------|--------------|----------|----------|--------------|----------|
| <b>20</b>          | -1098.524822 | 0.102028 | 0.176736 | -1098.874089 | -        |
| <b>MECP(20-16)</b> | -1098.474024 |          |          | -1098.822083 | -        |
| <b>21-ts</b>       | -2368.750288 | 0.433514 | 0.582091 | -2369.44248  | -479.80  |
| <b>22</b>          | -1607.64516  | 0.332083 | 0.424221 | -1608.168692 | -        |
| <b>23-ts</b>       | -1098.43747  | 0.097154 | 0.174168 | -1098.804876 | -139.26  |
| <b>24</b>          | -1098.476979 | 0.100787 | 0.175708 | -1098.83763  | -        |
| <b>MECP(24-25)</b> | -1098.466273 |          |          | -1098.827591 | -        |
| <b>25</b>          | -1098.498154 | 0.095075 | 0.175402 | -1098.847747 | -        |
| <b>26</b>          | -940.6643801 | 0.285364 | 0.360466 | -940.9845826 | -        |
| <b>27-ts</b>       | -1402.729034 | 0.524315 | 0.617504 | -1403.201012 | -1221.87 |
| <b>28</b>          | -940.1046779 | 0.278966 | 0.346703 | -940.5204787 | -        |
| <b>29</b>          | -1717.396708 | 0.349998 | 0.454707 | -1717.901066 | -        |
| <b>MECP(29-30)</b> | -1717.387863 |          |          | -1717.888406 | -        |
| <b>30</b>          | -1379.890889 | 0.340576 | 0.437606 | -1380.266205 | -        |

<sup>1</sup>The electronic energy calculated by B3-LYP in gas phase. <sup>2</sup>The thermal correction to Gibbs free energy calculated by B3-LYP in gas phase. <sup>3</sup>The thermal correction to enthalpy calculated by B3-LYP in gas phase. <sup>4</sup>The electronic energy calculated by B3-LYP in acetonitrile solvent. <sup>5</sup>The B3-LYP calculated imaginary frequencies for the transition states.

**Table S2** B3-LYP-D3 and M06-L calculated energies, enthalpies, and free energies.

| Geometry               | $E_{(\text{solv},\text{B3LYP-D3})}^1$ | $E_{(\text{solv},\text{M06-L})}^2$ |
|------------------------|---------------------------------------|------------------------------------|
| <b>2</b>               | -768.821085                           | -768.7022687                       |
| <b>MeCN</b>            | -132.808127                           | -132.7848496                       |
| <b>3a</b>              | -1278.19348                           | -1277.968608                       |
| <b>CF<sub>3</sub>·</b> | -337.673348                           | -337.6205025                       |
| <b>10</b>              | -1270.648101                          | -1270.466799                       |
| <b>11</b>              | -1906.660438                          | -1906.380519                       |
| <b>MECP(11-12)</b>     | -1906.639307                          | -1906.373352                       |
| <b>12</b>              | -1568.997905                          | -1568.772349                       |
| <b>13-ts</b>           | -1906.67062                           | -1906.390179                       |
| <b>14</b>              | -1906.746235                          | -1906.469855                       |

|                    |              |              |
|--------------------|--------------|--------------|
| <b>MECP(14-15)</b> | -1906.738162 | -1906.464592 |
| <b>15</b>          | -1906.78062  | -1906.489574 |
| <b>16</b>          | -761.396859  | -761.314289  |
| <b>MECP(12-17)</b> | -1906.666752 | -1906.383277 |
| <b>17</b>          | -1906.69425  | -1906.429124 |

<sup>1</sup>The electronic energy calculated by B3LYP-D3 in acetonitrile solvent. <sup>2</sup>The electronic energy calculated by M06-L in acetonitrile solvent.

## 6. B3-LYP Geometries for All the Optimized Compounds and Transition State

|             |             |             |             |   |             |             |             |
|-------------|-------------|-------------|-------------|---|-------------|-------------|-------------|
| <b>MeCN</b> |             |             |             | C | 4.40295600  | -2.03653800 | -0.25988200 |
| C           | 0.00000000  | 0.00000000  | 0.28061800  | H | 3.01081700  | 2.05216800  | 1.74237700  |
| N           | 0.00000000  | 0.00000000  | 1.44087200  | H | 6.43151200  | -1.46291400 | 0.20277600  |
| C           | 0.00000000  | 0.00000000  | -1.18107100 | H | 5.82589800  | 0.88810900  | 0.72249600  |
| H           | 0.00000000  | 1.02660900  | -1.56113000 | C | 3.34078400  | 2.03940200  | 0.69128300  |
| H           | 0.88907000  | -0.51330500 | -1.56113000 | C | 1.32636800  | 0.20733300  | -0.19483100 |
| H           | -0.88907000 | -0.51330500 | -1.56113000 | H | 2.31889100  | -2.31859400 | -0.67153200 |
| <b>CO2</b>  |             |             |             | H | 4.65501800  | -3.06811900 | -0.49126300 |
| C           | 0.00000000  | 0.00000000  | 0.00000000  | C | 1.08373200  | 1.52927300  | -0.26279400 |
| O           | 0.00000000  | 0.00000000  | 1.16958400  | C | 2.18929600  | 2.55107800  | -0.18364100 |
| O           | 0.00000000  | 0.00000000  | -1.16958400 | H | 0.06601400  | 1.87168900  | -0.42654400 |
| <b>CF3•</b> |             |             |             | H | 1.80740800  | 3.49878200  | 0.21456900  |
| C           | 0.00000000  | 0.00000000  | 0.32915400  | H | 4.20772900  | 2.70710200  | 0.62731000  |
| F           | 0.00000000  | 1.26437500  | -0.07314500 | H | 2.55718300  | 2.77330500  | -1.19928600 |
| F           | -1.09498100 | -0.63218800 | -0.07314500 | C | 0.21158500  | -0.81666000 | -0.29716600 |
| F           | 1.09498100  | -0.63218800 | -0.07314500 | H | 0.25034800  | -1.30602700 | -1.28275600 |
| <b>1a</b>   |             |             |             | H | 0.39721900  | -1.62358200 | 0.43892500  |
| C           | 5.39681700  | -1.13921100 | 0.12746800  | N | -1.11643300 | -0.23130600 | -0.15348700 |
| C           | 5.05414100  | 0.18443700  | 0.41714700  | H | -1.18409400 | 0.22467600  | 0.75567100  |
| C           | 3.73408800  | 0.62433300  | 0.32442800  | C | -2.19254100 | -1.21450000 | -0.27571700 |
| C           | 2.72031400  | -0.28132800 | -0.07064900 | H | -2.08269600 | -2.06298700 | 0.42663600  |
| C           | 3.07780700  | -1.60878500 | -0.35648600 | H | -2.12260300 | -1.64721200 | -1.28493300 |

|           |             |             |             |   |             |             |             |
|-----------|-------------|-------------|-------------|---|-------------|-------------|-------------|
| C         | -3.55669400 | -0.58189500 | -0.08445900 | C | 1.40556000  | 1.52855200  | 0.33716400  |
| C         | -4.52239100 | -1.19437200 | 0.72230300  | C | 1.00536400  | 2.35151300  | 1.39289800  |
| C         | -3.88127900 | 0.62070000  | -0.72884400 | C | 1.33168300  | 3.70920800  | 1.38407000  |
| C         | -5.78985700 | -0.62759700 | 0.87763500  | H | 1.65873700  | 0.94670100  | -2.49177000 |
| H         | -4.27979100 | -2.12322500 | 1.23441100  | H | 2.32638300  | 5.30049700  | 0.31921100  |
| C         | -5.14413800 | 1.19130100  | -0.57190500 | H | 3.04875900  | 3.83434800  | -1.54980900 |
| H         | -3.12942100 | 1.10607700  | -1.34416000 | C | 2.53494000  | 1.13389300  | -1.85449900 |
| C         | -6.10400300 | 0.56794400  | 0.23049400  | C | 1.06520300  | 0.04540900  | 0.29871700  |
| H         | -6.52707000 | -1.11724300 | 1.50876600  | H | 0.45204700  | 1.92456900  | 2.22173500  |
| H         | -5.38131500 | 2.12416000  | -1.07731300 | H | 1.01776600  | 4.34331000  | 2.20857900  |
| H         | -7.08790800 | 1.01347300  | 0.35196500  | C | 2.37078000  | -0.73484800 | -0.04606400 |
| <b>2</b>  |             |             |             | C | 3.08165000  | -0.21391000 | -1.33374700 |
| O         | 1.28186500  | -2.12327100 | 0.00008800  | H | 3.02268900  | -0.56143700 | 0.81620800  |
| C         | 2.09618300  | 0.10820300  | -0.00027000 | H | 3.00375200  | -0.95789000 | -2.13159700 |
| C         | 0.82308600  | 0.64067200  | 0.00006600  | H | 3.28091700  | 1.60436100  | -2.50404900 |
| C         | 3.16264100  | 1.01765500  | -0.00026400 | H | 4.14745400  | -0.11024500 | -1.11154500 |
| C         | 0.52152100  | 1.99234600  | 0.00035700  | C | -0.16102500 | -0.26528200 | -0.61970200 |
| C         | 2.92021600  | 2.38890300  | 0.00006500  | H | -0.71923300 | 0.65104400  | -0.85270800 |
| C         | 1.60911200  | 2.87376000  | 0.00035500  | H | 0.12419100  | -0.74789300 | -1.55788200 |
| H         | -0.49100200 | 2.37182400  | 0.00063700  | N | -0.93131600 | -1.16118300 | 0.21762200  |
| H         | 3.75284000  | 3.08618300  | 0.00009200  | C | -2.21775400 | -1.72374100 | -0.17436600 |
| H         | 1.41796100  | 3.94303600  | 0.00074000  | H | -2.48148000 | -2.43494800 | 0.61347000  |
| H         | 4.16616900  | 0.60404600  | -0.00048100 | H | -2.07682500 | -2.28720400 | -1.10439000 |
| I         | -0.70401300 | -0.94648000 | 0.00030700  | C | -3.31491700 | -0.68728900 | -0.34855900 |
| C         | -2.44353800 | 0.55593600  | -0.00031100 | C | -3.81459800 | 0.00035200  | 0.76808400  |
| F         | -3.55819700 | -0.18930400 | -0.00092400 | C | -3.83752100 | -0.39706100 | -1.61321000 |
| F         | -2.45303100 | 1.34252400  | -1.08639100 | C | -4.81547900 | 0.95898000  | 0.61618300  |
| F         | -2.45373100 | 1.34202200  | 1.08606100  | H | -3.41740700 | -0.22722400 | 1.75419800  |
| C         | 2.36077500  | -1.39288000 | -0.00038200 | C | -4.84275400 | 0.56165300  | -1.76684400 |
| O         | 3.51205900  | -1.80252500 | -0.00054400 | H | -3.46051700 | -0.92918500 | -2.48448300 |
| <b>3a</b> |             |             |             | C | -5.33234300 | 1.24217800  | -0.65190000 |
| C         | 2.06558100  | 4.24562200  | 0.32550300  | H | -5.19829300 | 1.48185200  | 1.48868700  |
| C         | 2.47164400  | 3.42149100  | -0.72546000 | H | -5.24098500 | 0.77460400  | -2.75545000 |
| C         | 2.14402100  | 2.06325200  | -0.73226000 | H | -6.11496300 | 1.98724600  | -0.76778000 |

|          |             |             |             |          |             |             |             |
|----------|-------------|-------------|-------------|----------|-------------|-------------|-------------|
| O        | 0.61980400  | -0.36646500 | 1.60803000  | C        | 0.85080400  | -1.24140000 | -0.50733200 |
| C        | -0.54619100 | -1.09055500 | 1.53032800  | H        | 0.88518500  | -0.96346400 | -1.56545200 |
| O        | -1.09361200 | -1.56308700 | 2.49983200  | H        | 1.09208200  | -2.31331900 | -0.45824200 |
| C        | 2.23934300  | -2.25281600 | -0.12527700 | N        | -0.56130400 | -1.04027600 | -0.06852300 |
| F        | 1.72741000  | -2.80707400 | 0.98714700  | H        | -0.61207000 | -1.28025900 | 0.92551100  |
| F        | 1.46877700  | -2.65850200 | -1.16835200 | C        | -1.50359600 | -1.98514800 | -0.77249700 |
| F        | 3.46354300  | -2.80191500 | -0.31470900 | H        | -1.16718000 | -3.01245000 | -0.58290200 |
| <b>4</b> |             |             |             | H        | -1.40863800 | -1.79422100 | -1.84517200 |
| Cu       | -1.12624400 | 0.82041100  | -0.17926500 | C        | -2.92272200 | -1.77958800 | -0.30537200 |
| N        | -1.64226700 | 2.59762000  | -0.32752300 | C        | -3.36219400 | -2.35458500 | 0.89597700  |
| C        | -1.95140800 | 3.70825000  | -0.41574600 | C        | -3.81214200 | -0.98973000 | -1.04871700 |
| C        | -2.33948000 | 5.10612900  | -0.52682300 | C        | -4.66067600 | -2.12971000 | 1.35510700  |
| H        | -3.15381500 | 5.20842400  | -1.25128700 | H        | -2.69438400 | -2.99833200 | 1.46585000  |
| H        | -2.67650800 | 5.47500300  | 0.44728800  | C        | -5.11354800 | -0.76863900 | -0.59269300 |
| H        | -1.48404300 | 5.70218100  | -0.86076100 | H        | -3.49454200 | -0.57017300 | -2.00155300 |
| C        | 5.95823200  | -0.55901000 | -1.05298800 | C        | -5.53679200 | -1.33421200 | 0.61203600  |
| C        | 5.63557400  | -0.12946600 | 0.23618800  | H        | -4.99264100 | -2.58645300 | 2.28273300  |
| C        | 4.31249800  | -0.09800800 | 0.67600000  | H        | -5.79953100 | -0.16973700 | -1.18474600 |
| C        | 3.27698900  | -0.50278500 | -0.20079500 | H        | -6.55093900 | -1.16915300 | 0.96361200  |
| C        | 3.61620600  | -0.93862900 | -1.49267500 | <b>5</b> |             |             |             |
| C        | 4.94410400  | -0.96670500 | -1.91806200 | C        | -2.95889100 | 0.00499800  | 0.07933500  |
| H        | 3.91708200  | -0.60525700 | 2.71693200  | C        | -2.10057800 | -1.18760800 | 0.53179400  |
| H        | 6.99473800  | -0.57461900 | -1.37686300 | C        | -0.92090200 | -1.48150600 | -0.41456000 |
| H        | 6.42584100  | 0.18247100  | 0.91464500  | C        | -2.12688500 | 1.15888600  | -0.50496600 |
| C        | 3.96542400  | 0.30145600  | 2.09400700  | C        | 0.37010900  | -0.72098400 | -0.13425800 |
| C        | 1.87418200  | -0.45337700 | 0.28366400  | C        | -0.84292500 | 1.47433600  | 0.27296200  |
| H        | 2.84710300  | -1.25621100 | -2.19019900 | H        | -3.55151900 | 0.37030300  | 0.92860100  |
| H        | 5.18152000  | -1.30417600 | -2.92258100 | H        | -2.73343200 | -2.08011600 | 0.60631800  |
| C        | 1.56720500  | 0.25163400  | 1.39217500  | H        | -1.22936400 | -1.30977800 | -1.45582000 |
| C        | 2.61293200  | 1.01928200  | 2.16375200  | H        | -2.74247400 | 2.06704300  | -0.52613500 |
| H        | 0.54722200  | 0.29631900  | 1.77156400  | H        | -0.56464900 | 2.51220200  | 0.05762800  |
| H        | 2.30108600  | 1.14189000  | 3.20654000  | N        | 0.34275700  | 0.67795300  | -0.07516100 |
| H        | 4.75544900  | 0.92896400  | 2.51942800  | C        | 1.59356500  | 1.35682900  | 0.27922300  |
| H        | 2.70350400  | 2.03468900  | 1.74540800  | H        | 1.55028400  | 2.37624300  | -0.12427700 |

|             |             |             |             |   |             |             |             |
|-------------|-------------|-------------|-------------|---|-------------|-------------|-------------|
| H           | 1.68803900  | 1.45093600  | 1.37540900  | C | 0.78534800  | -2.76821600 | 0.18325300  |
| C           | 2.79532000  | 0.60748700  | -0.28370500 | C | 1.56948900  | -3.58895700 | 1.17500700  |
| H           | 2.76461700  | 0.64763300  | -1.37976500 | H | -0.30196300 | -2.81831000 | 0.22356800  |
| H           | 3.72479600  | 1.09174800  | 0.03920700  | H | 1.00780800  | -4.48433800 | 1.46496400  |
| N           | 1.42227000  | -1.45880900 | -0.03950500 | H | 3.56909800  | -4.42936700 | 1.36484800  |
| C           | 2.72538600  | -0.84742300 | 0.18060200  | H | 1.71214300  | -3.00513900 | 2.10056100  |
| H           | 3.47712600  | -1.45345300 | -0.34144300 | C | 0.52961200  | -1.09085300 | -1.63288300 |
| H           | 2.97495300  | -0.91460800 | 1.25145000  | H | 1.06233800  | -0.92984500 | -2.58178700 |
| H           | -0.63013200 | -2.53119800 | -0.34461100 | H | -0.37763400 | -1.65775800 | -1.90311300 |
| H           | -1.71209300 | -1.01316100 | 1.54386500  | N | 0.15982300  | 0.21633300  | -1.02878100 |
| H           | -3.68151900 | -0.32477600 | -0.67881900 | H | -1.07925500 | -0.04545100 | -0.14095300 |
| H           | -1.85302600 | 0.95337200  | -1.54649500 | C | -0.26647500 | 1.16652400  | -2.08522600 |
| H           | -1.04198500 | 1.43351500  | 1.35898900  | H | -1.20799500 | 0.82204500  | -2.54777200 |
| <b>6-ts</b> |             |             |             | H | 0.47594200  | 1.18658200  | -2.89930600 |
| Cu          | 1.44534100  | 0.91864700  | 0.17874600  | C | -0.45239700 | 2.57282600  | -1.55497400 |
| N           | 2.67236200  | 1.58875100  | 1.40583600  | C | -1.66944800 | 2.99112300  | -0.99980500 |
| C           | 3.49544700  | 1.98713300  | 2.11433700  | C | 0.60971400  | 3.48909700  | -1.59661400 |
| C           | 4.53919200  | 2.48657900  | 2.99873000  | C | -1.81870000 | 4.28054100  | -0.48437400 |
| H           | 4.58946900  | 3.57823800  | 2.93651000  | H | -2.51388100 | 2.30589400  | -0.98590000 |
| H           | 4.32523200  | 2.19700400  | 4.03236900  | C | 0.46617200  | 4.78016800  | -1.08389600 |
| H           | 5.50589600  | 2.06655500  | 2.70313600  | H | 1.55083900  | 3.19268000  | -2.05583000 |
| C           | 5.67187800  | -1.70464600 | -0.78587800 | C | -0.74882900 | 5.17774800  | -0.52126300 |
| C           | 5.02259800  | -2.72935200 | -0.09168100 | H | -2.77418600 | 4.59164500  | -0.07003600 |
| C           | 3.63027800  | -2.82136600 | -0.07325900 | H | 1.29569300  | 5.47988200  | -1.14005400 |
| C           | 2.85610900  | -1.85597900 | -0.76166200 | H | -0.86713500 | 6.18484900  | -0.13157400 |
| C           | 3.52340100  | -0.84092000 | -1.47015100 | C | -5.54237300 | -2.24109200 | -1.46105000 |
| C           | 4.91727800  | -0.76179300 | -1.48264800 | C | -4.01145800 | -2.36059900 | -1.42912100 |
| H           | 2.76925900  | -4.77168300 | -0.16450900 | C | -3.31149500 | -1.01342400 | -1.16447100 |
| H           | 6.75715600  | -1.65513500 | -0.79299200 | C | -6.08372300 | -1.28937100 | -0.38362900 |
| H           | 5.60883400  | -3.47986900 | 0.43383400  | C | -3.12230600 | -0.64164100 | 0.29599700  |
| C           | 2.93039800  | -3.98783800 | 0.59207800  | C | -5.41852600 | -1.44760900 | 0.98691400  |
| C           | 1.37409100  | -1.95092400 | -0.71273500 | H | -5.98482000 | -3.23640500 | -1.33512100 |
| H           | 2.95248300  | -0.10410200 | -2.02755200 | H | -3.65249600 | -2.75608600 | -2.38502300 |
| H           | 5.40793700  | 0.02871300  | -2.04405100 | H | -3.85659100 | -0.20098400 | -1.66262100 |

|          |             |             |             |          |             |             |             |
|----------|-------------|-------------|-------------|----------|-------------|-------------|-------------|
| H        | -7.15571200 | -1.47117600 | -0.24626100 | H        | 1.73471300  | 1.38618400  | 1.47885900  |
| H        | -6.08762300 | -1.03283800 | 1.74483300  | C        | 2.75612700  | 0.69466400  | -0.31741400 |
| N        | -4.12600300 | -0.74381800 | 1.19525300  | H        | 2.64614900  | 0.80656900  | -1.40150800 |
| C        | -3.88442700 | -0.36963700 | 2.60545300  | H        | 3.68576800  | 1.19071900  | -0.02555900 |
| H        | -4.83244800 | -0.01236200 | 3.01671300  | N        | 1.45941900  | -1.34578900 | -0.07695800 |
| H        | -3.59732000 | -1.26495200 | 3.17436900  | C        | 2.80917000  | -0.78030400 | 0.05551700  |
| C        | -2.81720800 | 0.71167200  | 2.71830500  | H        | 3.47493800  | -1.33919200 | -0.60745400 |
| H        | -3.19145600 | 1.64875500  | 2.29041300  | H        | 3.15794000  | -0.92303600 | 1.08504300  |
| H        | -2.58983600 | 0.89511100  | 3.77281400  | H        | -0.64880300 | -2.54381700 | -0.08820800 |
| N        | -1.92714300 | -0.18635200 | 0.61885100  | H        | -1.81342900 | -0.88653600 | 1.59319200  |
| C        | -1.57392500 | 0.26053300  | 1.96615900  | H        | -3.65289100 | -0.38469200 | -0.79304100 |
| H        | -0.85268700 | 1.07713300  | 1.85841200  | H        | -1.77151000 | 0.85168500  | -1.62626200 |
| H        | -1.06629600 | -0.55607000 | 2.49675400  | H        | -1.18072500 | 1.58200900  | 1.29396400  |
| H        | -2.31552100 | -1.02400000 | -1.60656300 | H        | 1.38708700  | -2.34511700 | -0.21415600 |
| H        | -3.69764600 | -3.08783100 | -0.66943300 | <b>8</b> |             |             |             |
| H        | -5.86674800 | -1.88133100 | -2.44489900 | Cu       | -1.14913800 | 0.69404900  | -0.28409600 |
| H        | -5.99843900 | -0.24255800 | -0.69894500 | N        | -1.85112600 | 2.38698000  | -0.50012300 |
| H        | -5.28889500 | -2.51103100 | 1.23298300  | C        | -2.30666600 | 3.43891900  | -0.66469100 |
|          |             |             |             | C        | -2.88096400 | 4.75956900  | -0.88379900 |
| <b>7</b> |             |             |             | H        | -3.75474000 | 4.68233300  | -1.53887900 |
| C        | -2.98682000 | 0.00546000  | -0.01477700 | H        | -3.19023300 | 5.20066300  | 0.06924900  |
| C        | -2.15399400 | -1.13896100 | 0.58134400  | H        | -2.14152200 | 5.41510100  | -1.35495200 |
| C        | -0.93545000 | -1.50614600 | -0.28670000 | C        | 6.02594500  | -0.54357700 | -1.02397600 |
| C        | -2.11924000 | 1.11883000  | -0.62073200 | C        | 5.68527700  | 0.06580500  | 0.18616300  |
| C        | 0.30887100  | -0.66454900 | -0.06953800 | C        | 4.36260000  | 0.11023300  | 0.62652600  |
| C        | -0.91156400 | 1.51453600  | 0.23222800  | C        | 3.33368500  | -0.46479600 | -0.16240700 |
| H        | -3.63374000 | 0.42024300  | 0.76654100  | C        | 3.69565200  | -1.07749700 | -1.37433400 |
| H        | -2.77513300 | -2.03340000 | 0.69047200  | C        | 5.02346300  | -1.11818800 | -1.80258700 |
| H        | -1.19632800 | -1.46406300 | -1.35237900 | H        | 3.96784400  | -0.08432300 | 2.72014700  |
| H        | -2.72620000 | 2.02150700  | -0.75077100 | H        | 7.06209500  | -0.56661400 | -1.35164000 |
| H        | -0.57600000 | 2.50743600  | -0.07404300 | H        | 6.46191000  | 0.51287200  | 0.80383100  |
| N        | 0.30275200  | 0.65280800  | 0.11404300  | C        | 4.00548900  | 0.71794200  | 1.96566700  |
| C        | 1.58094600  | 1.35907800  | 0.39271700  | C        | 1.92809000  | -0.39283100 | 0.32045900  |
| H        | 1.46469400  | 2.38872600  | 0.04983700  | H        | 2.93303800  | -1.52499400 | -2.00231700 |

|             |             |             |             |   |             |             |             |
|-------------|-------------|-------------|-------------|---|-------------|-------------|-------------|
| H           | 5.26897300  | -1.59737100 | -2.74701000 | C | 4.74369400  | 0.90986100  | -0.57934900 |
| C           | 1.61404700  | 0.48071100  | 1.29746300  | C | 3.95915000  | -0.18277100 | -0.20688500 |
| C           | 2.63493500  | 1.40133100  | 1.91950400  | C | 2.66201500  | -0.33562400 | -0.75412300 |
| H           | 0.58891500  | 0.51952400  | 1.65433500  | C | 2.21511800  | 0.61444600  | -1.68921400 |
| H           | 2.32401200  | 1.69096600  | 2.93061800  | C | 3.01138600  | 1.70048100  | -2.05693100 |
| H           | 4.78618700  | 1.41693600  | 2.28895100  | H | 4.94776700  | -2.05171000 | 0.08043800  |
| H           | 2.70473300  | 2.33701700  | 1.33925600  | H | 4.90545300  | 2.69978500  | -1.77456900 |
| C           | 0.89259200  | -1.33275600 | -0.27832300 | H | 5.73947700  | 1.01464900  | -0.15276100 |
| H           | 1.07349500  | -1.41929100 | -1.36768200 | C | 4.50187700  | -1.26189000 | 0.70632800  |
| H           | 1.11781500  | -2.34508200 | 0.11557300  | C | 1.82638800  | -1.48885500 | -0.33416300 |
| N           | -0.48942400 | -1.00191200 | 0.00379300  | H | 1.22939900  | 0.50652200  | -2.13019800 |
| C           | -1.35674600 | -2.13257900 | -0.29168400 | H | 2.63975000  | 2.41965700  | -2.78266700 |
| H           | -1.04971100 | -3.00666100 | 0.31695500  | C | 2.19103500  | -2.21875100 | 0.73839800  |
| H           | -1.27951500 | -2.47158000 | -1.34636400 | C | 3.40450800  | -1.89346200 | 1.57070900  |
| C           | -2.81161400 | -1.82700100 | 0.00184400  | H | 1.56343900  | -3.05084800 | 1.05128100  |
| C           | -3.25154700 | -1.66989300 | 1.32522800  | H | 3.78742400  | -2.79419400 | 2.06490400  |
| C           | -3.74544400 | -1.67928700 | -1.03139500 | H | 5.31193900  | -0.86539600 | 1.32976600  |
| C           | -4.58523400 | -1.37196500 | 1.60608800  | H | 3.11352300  | -1.20209400 | 2.37966400  |
| H           | -2.53428100 | -1.78227400 | 2.13429100  | C | 0.54564300  | -1.81680400 | -1.07647200 |
| C           | -5.08344000 | -1.38113900 | -0.75641800 | H | 0.69127300  | -1.62394300 | -2.15613400 |
| H           | -3.41835600 | -1.80504500 | -2.06159600 | H | 0.35693900  | -2.89996600 | -0.99131600 |
| C           | -5.50695500 | -1.22591600 | 0.56442600  | N | -0.62900200 | -1.08904600 | -0.57449100 |
| H           | -4.90930200 | -1.26118800 | 2.63825800  | C | -1.76717700 | -1.36486400 | -1.45789900 |
| H           | -5.79357900 | -1.27594000 | -1.57329800 | H | -1.98360200 | -2.44728900 | -1.44281300 |
| H           | -6.54790500 | -1.00044800 | 0.78286900  | H | -1.51640200 | -1.11826800 | -2.50787700 |
| <b>9-ts</b> |             |             |             | C | -3.01508900 | -0.60227500 | -1.06621600 |
| Cu          | -0.45998200 | 0.61253200  | 0.19365800  | C | -3.94568200 | -1.14789500 | -0.17151500 |
| N           | -0.30447700 | 2.24478300  | 1.05014800  | C | -3.26076200 | 0.67797400  | -1.58479400 |
| C           | -0.19541100 | 3.25207100  | 1.60863900  | C | -5.08201300 | -0.42960200 | 0.20701100  |
| C           | -0.05539900 | 4.51929500  | 2.31320900  | H | -3.77752100 | -2.14625000 | 0.22447400  |
| H           | -0.78348400 | 5.24215100  | 1.93177100  | C | -4.39664500 | 1.39971100  | -1.21189200 |
| H           | -0.22779200 | 4.37270700  | 3.38422300  | H | -2.55900500 | 1.10387500  | -2.29947900 |
| H           | 0.95315900  | 4.91849900  | 2.16621000  | C | -5.30975100 | 0.84756000  | -0.31009500 |
| C           | 4.27860100  | 1.85656600  | -1.49588600 | H | -5.79324100 | -0.87093000 | 0.90070800  |

|           |             |             |             |           |             |             |             |
|-----------|-------------|-------------|-------------|-----------|-------------|-------------|-------------|
| H         | -4.57458300 | 2.38620500  | -1.63347800 | H         | 0.58412400  | -1.27148600 | -1.74396200 |
| H         | -6.19793000 | 1.40398300  | -0.02151700 | N         | -0.06792500 | 0.65283100  | -1.30356600 |
| C         | -1.13964800 | -2.15569400 | 1.43480600  | C         | 0.13220400  | 2.02304500  | -1.78807500 |
| O         | -1.06474100 | -1.25849600 | 2.20788400  | H         | -0.83038200 | 2.35737700  | -2.18255600 |
| O         | -1.30815700 | -3.25745500 | 1.03357900  | H         | 0.84551900  | 1.98196900  | -2.62029100 |
| <b>10</b> |             |             |             | C         | 0.62534900  | 3.02081900  | -0.75239800 |
| Cu        | -3.31254000 | -1.04189800 | -0.16929800 | C         | 1.92513300  | 3.53496500  | -0.80700700 |
| N         | -5.06272500 | -1.30995500 | 0.31032800  | C         | -0.23112200 | 3.45397100  | 0.27231300  |
| C         | -6.17640900 | -1.42500500 | 0.60263700  | C         | 2.37063700  | 4.45869400  | 0.14224200  |
| C         | -7.57855600 | -1.56838800 | 0.96995400  | H         | 2.59713900  | 3.21029800  | -1.59902100 |
| H         | -7.66704800 | -2.15857700 | 1.88760600  | C         | 0.21276200  | 4.37347100  | 1.22249000  |
| H         | -8.02317100 | -0.58204100 | 1.13633600  | H         | -1.24174800 | 3.05644400  | 0.30977300  |
| H         | -8.12508900 | -2.07404000 | 0.16753800  | C         | 1.51491600  | 4.87941000  | 1.16073300  |
| C         | 4.95980100  | -3.51179500 | -0.24347400 | H         | 3.38435100  | 4.84740300  | 0.08496600  |
| C         | 4.46024500  | -3.04156000 | 0.97429300  | H         | -0.46057200 | 4.70216100  | 2.01054900  |
| C         | 3.43053700  | -2.10242600 | 1.01818900  | H         | 1.85784300  | 5.59852700  | 1.90039200  |
| C         | 2.88028300  | -1.60553100 | -0.18896100 | C         | -1.33419400 | 0.26278300  | -0.92064300 |
| C         | 3.38709700  | -2.09349400 | -1.40492300 | O         | -1.48420600 | -0.99797100 | -0.61829900 |
| C         | 4.41620600  | -3.03644900 | -1.43521200 | O         | -2.28071300 | 1.08682300  | -0.87149700 |
| H         | 1.95300400  | -2.26381400 | 2.55172800  | <b>11</b> |             |             |             |
| H         | 5.76425000  | -4.24257200 | -0.25732700 | Cu        | -0.07653100 | -1.05360900 | -0.64707700 |
| H         | 4.87499000  | -3.41460200 | 1.90876600  | C         | -5.65211500 | 5.37183900  | -0.42360700 |
| C         | 2.83528300  | -1.64187300 | 2.33115000  | C         | -5.36891700 | 4.78135700  | 0.81133700  |
| C         | 1.80493800  | -0.58623900 | -0.12537900 | C         | -5.03188300 | 3.43167800  | 0.90678400  |
| H         | 2.98273500  | -1.73348400 | -2.34570000 | C         | -4.98080300 | 2.63449600  | -0.26347900 |
| H         | 4.79137800  | -3.39409500 | -2.39069100 | C         | -5.25912000 | 3.24439000  | -1.49820700 |
| C         | 1.58117100  | 0.08000200  | 1.01986600  | C         | -5.59169300 | 4.59785400  | -1.58077600 |
| C         | 2.38730900  | -0.17704600 | 2.26764400  | H         | -3.55634400 | 2.83945000  | 2.33216000  |
| H         | 0.82422100  | 0.85708300  | 1.04680700  | H         | -5.91547000 | 6.42510600  | -0.47741400 |
| H         | 1.80116200  | 0.07500300  | 3.15932200  | H         | -5.40591500 | 5.38165500  | 1.71853200  |
| H         | 3.54571300  | -1.80108400 | 3.15104900  | C         | -4.65289700 | 2.80333100  | 2.23045800  |
| H         | 3.26609300  | 0.48916400  | 2.28176700  | C         | -4.65070000 | 1.19379600  | -0.14324800 |
| C         | 1.01005000  | -0.32414900 | -1.39733000 | H         | -5.22347200 | 2.65989200  | -2.41195800 |
| H         | 1.69118700  | 0.02522800  | -2.18503600 | H         | -5.80581900 | 5.04172600  | -2.54979900 |



|   |             |             |             |                    |             |             |             |
|---|-------------|-------------|-------------|--------------------|-------------|-------------|-------------|
| C | -4.70772800 | 0.59359700  | 1.05771400  | H                  | 7.34219300  | -1.09017800 | 0.40419300  |
| C | -5.09521500 | 1.33763800  | 2.31022000  | H                  | 5.32196100  | -4.88137600 | 0.19097700  |
| H | -4.50987700 | -0.47079500 | 1.13119500  | H                  | 7.41115400  | -3.55542000 | 0.45493500  |
| H | -4.65137200 | 0.85944900  | 3.19148800  | H                  | 3.13576400  | -3.70277700 | -0.13013300 |
| H | -5.06576600 | 3.38570600  | 3.06298400  | I                  | 4.92509600  | 1.12381100  | 0.03958600  |
| H | -6.18778900 | 1.27902300  | 2.44923300  | C                  | 7.14660600  | 1.56741100  | 0.35589000  |
| C | -4.28667700 | 0.44381800  | -1.41821100 | F                  | 7.23837600  | 2.89784800  | 0.36034600  |
| H | -5.13156400 | 0.49860300  | -2.11931400 | F                  | 7.90041000  | 1.07427300  | -0.62886400 |
| H | -3.44530000 | 0.95676300  | -1.89554800 | F                  | 7.59028400  | 1.08816400  | 1.51969500  |
| N | -3.93986400 | -0.96202800 | -1.27318400 | C                  | 2.69015200  | -1.03298000 | -0.23898700 |
| C | -4.93283200 | -1.99817000 | -1.56652000 | O                  | 1.66099300  | -1.73823500 | -0.36889000 |
| H | -4.38671000 | -2.83809200 | -2.00335800 | <b>MECP(11-12)</b> |             |             |             |
| H | -5.61894200 | -1.60360500 | -2.32653600 | Cu                 | 0.07821100  | -1.34248200 | -0.51645600 |
| C | -5.73910100 | -2.49392900 | -0.37569100 | C                  | -5.85490300 | 5.26257500  | -0.44970500 |
| C | -5.12226200 | -3.27169600 | 0.61753400  | C                  | -5.52536200 | 4.70619000  | 0.79046500  |
| C | -7.10150800 | -2.20110300 | -0.25224200 | C                  | -5.07784500 | 3.38836300  | 0.89557100  |
| C | -5.85609600 | -3.73376800 | 1.71002200  | C                  | -4.95550900 | 2.59240600  | -0.27176100 |
| H | -4.06478800 | -3.50031400 | 0.51600400  | C                  | -5.28414000 | 3.16798400  | -1.51160700 |
| C | -7.83912700 | -2.66607100 | 0.84000300  | C                  | -5.73020200 | 4.48858900  | -1.60307800 |
| H | -7.59162600 | -1.60194700 | -1.01737900 | H                  | -3.57512700 | 2.90576000  | 2.33850300  |
| C | -7.21697700 | -3.43316000 | 1.82544500  | H                  | -6.20620300 | 6.28981200  | -0.51054800 |
| H | -5.36669200 | -4.33580700 | 2.47210600  | H                  | -5.61368000 | 5.30750800  | 1.69397900  |
| H | -8.89705000 | -2.42771400 | 0.91986400  | C                  | -4.66574400 | 2.79385200  | 2.22532000  |
| H | -7.78753500 | -3.79703000 | 2.67645000  | C                  | -4.49716100 | 1.18727400  | -0.14010700 |
| C | -2.62336400 | -1.35331800 | -1.05316900 | H                  | -5.20200400 | 2.58204500  | -2.42238700 |
| O | -2.32410400 | -2.56073600 | -0.98894500 | H                  | -5.98039300 | 4.90630000  | -2.57533500 |
| O | -1.77480700 | -0.36599100 | -0.92671100 | C                  | -4.52500200 | 0.58590800  | 1.06266900  |
| O | 2.72875200  | 0.23848800  | -0.25910800 | C                  | -5.00746100 | 1.30140300  | 2.29987600  |
| C | 3.99715600  | -1.75055100 | -0.04334800 | H                  | -4.22869800 | -0.45464300 | 1.15264200  |
| C | 5.19056600  | -1.06195600 | 0.11002900  | H                  | -4.56277600 | 0.85640900  | 3.19801700  |
| C | 4.06254800  | -3.15186500 | -0.01103600 | H                  | -5.12830900 | 3.34695900  | 3.05180900  |
| C | 6.42787200  | -1.65512100 | 0.28904000  | H                  | -6.09822100 | 1.16817900  | 2.39865300  |
| C | 5.28357500  | -3.79681200 | 0.16773600  | C                  | -4.02396700 | 0.48856100  | -1.40646200 |
| C | 6.45737900  | -3.05506900 | 0.31621000  | H                  | -4.83449100 | 0.48327000  | -2.14791800 |

|   |             |             |             |           |             |             |             |
|---|-------------|-------------|-------------|-----------|-------------|-------------|-------------|
| H | -3.20321400 | 1.07008500  | -1.84089800 | F         | 7.36332300  | 1.63434400  | 1.49916900  |
| N | -3.57391800 | -0.89221200 | -1.26536300 | C         | 2.53380400  | -1.50509000 | -0.17507900 |
| C | -4.47497900 | -2.00587900 | -1.59316500 | O         | 1.66737300  | -2.42972900 | -0.24797700 |
| H | -3.84934500 | -2.80518300 | -1.99756000 | <b>12</b> |             |             |             |
| H | -5.14558100 | -1.66584900 | -2.39148900 | Cu        | 0.99827500  | -0.98049400 | -0.66127100 |
| C | -5.29659900 | -2.53949000 | -0.43240800 | C         | -5.83050200 | 4.71617700  | -0.26983200 |
| C | -4.67360500 | -3.25396100 | 0.60326100  | C         | -5.34218800 | 4.20578000  | 0.93602700  |
| C | -6.68099300 | -2.34516300 | -0.38192900 | C         | -4.67031000 | 2.98494900  | 0.98437800  |
| C | -5.42389700 | -3.74988400 | 1.66923200  | C         | -4.48305600 | 2.24060500  | -0.20594900 |
| H | -3.59917200 | -3.41165000 | 0.56049700  | C         | -4.97198200 | 2.76965300  | -1.41173500 |
| C | -7.43502300 | -2.84704200 | 0.68241700  | C         | -5.63983700 | 3.99500500  | -1.44665300 |
| H | -7.17487400 | -1.79585100 | -1.18152300 | H         | -3.02090400 | 2.77446300  | 2.32482200  |
| C | -6.80704400 | -3.54824600 | 1.71236800  | H         | -6.35258900 | 5.66910100  | -0.28642600 |
| H | -4.92963400 | -4.30274600 | 2.46430600  | H         | -5.48098800 | 4.76900800  | 1.85654500  |
| H | -8.51059100 | -2.69014700 | 0.70435900  | C         | -4.07535300 | 2.46053900  | 2.27329600  |
| H | -7.39067600 | -3.93956800 | 2.54202100  | C         | -3.79168100 | 0.93080000  | -0.13100800 |
| C | -2.26287700 | -1.15936000 | -0.98271700 | H         | -4.84092500 | 2.22433200  | -2.34130900 |
| O | -1.83456900 | -2.35541100 | -0.91351200 | H         | -6.01039800 | 4.38000600  | -2.39294100 |
| O | -1.44719200 | -0.17241300 | -0.78880700 | C         | -3.63083300 | 0.32074100  | 1.05524500  |
| O | 2.19570200  | -0.28484200 | -0.25400700 | C         | -4.12814400 | 0.92986300  | 2.34121600  |
| C | 3.96898600  | -1.88346600 | -0.00131000 | H         | -3.16781600 | -0.65978900 | 1.10130000  |
| C | 4.99968300  | -0.95064900 | 0.09501400  | H         | -3.53228300 | 0.57014200  | 3.18794600  |
| C | 4.31261800  | -3.24258200 | 0.06129800  | H         | -4.57910000 | 2.90813900  | 3.13778200  |
| C | 6.33077000  | -1.31117200 | 0.24290500  | H         | -5.16106400 | 0.59250000  | 2.52822700  |
| C | 5.63787200  | -3.63580900 | 0.21252100  | C         | -3.31060700 | 0.32779300  | -1.44167600 |
| C | 6.64271200  | -2.67249400 | 0.30139500  | H         | -4.16205600 | 0.16708000  | -2.11391900 |
| H | 7.12031600  | -0.57712400 | 0.30893800  | H         | -2.64568400 | 1.04204700  | -1.93935700 |
| H | 5.88689000  | -4.69105900 | 0.25955200  | N         | -2.60991800 | -0.95521900 | -1.35055700 |
| H | 7.68046400  | -2.97014200 | 0.41689800  | C         | -3.30985700 | -2.21815200 | -1.65367100 |
| H | 3.51088800  | -3.96845600 | -0.01373800 | H         | -2.55675300 | -2.90908800 | -2.03824700 |
| I | 4.43372800  | 1.14985100  | 0.00251300  | H         | -4.01619800 | -2.00681400 | -2.46402200 |
| C | 6.84857900  | 1.98727600  | 0.31887000  | C         | -4.04239200 | -2.84732900 | -0.48282100 |
| F | 6.71362200  | 3.31138000  | 0.26533200  | C         | -3.32893300 | -3.53712300 | 0.50890900  |
| F | 7.66854400  | 1.57983500  | -0.65515500 | C         | -5.43473600 | -2.75852200 | -0.37794900 |

|              |             |             |             |   |             |             |             |
|--------------|-------------|-------------|-------------|---|-------------|-------------|-------------|
| C            | -3.99849900 | -4.11450500 | 1.58788000  | H | -8.74087300 | -2.23083700 | 0.06877200  |
| H            | -2.24804100 | -3.61610200 | 0.42700300  | H | -7.02991800 | -3.92443100 | 0.67256300  |
| C            | -6.10708900 | -3.33866800 | 0.70017200  | C | -4.33036100 | -3.76461200 | 0.43363700  |
| H            | -5.99896100 | -2.23228700 | -1.14512500 | C | -3.51035700 | -1.30532500 | -0.84245100 |
| C            | -5.38933200 | -4.01631600 | 1.68653300  | H | -5.65483000 | 0.37633500  | -1.34989700 |
| H            | -3.43522700 | -4.64815900 | 2.34896900  | H | -8.02251900 | -0.06690500 | -0.94574600 |
| H            | -7.18906600 | -3.26169500 | 0.76740900  | C | -2.63203300 | -2.34917600 | -0.74595900 |
| H            | -5.91019600 | -4.47023600 | 2.52540000  | C | -3.10739400 | -3.75715900 | -0.48870300 |
| C            | -1.28504400 | -0.96896000 | -1.09627900 | H | -1.61663900 | -2.20608300 | -1.10656000 |
| O            | -0.61715600 | -2.07419100 | -1.02249400 | H | -2.30723800 | -4.36874000 | -0.06081400 |
| O            | -0.61961400 | 0.12097700  | -0.92060100 | H | -4.77684100 | -4.76455800 | 0.47475000  |
| O            | 2.64188500  | 0.09701900  | -0.28846000 | H | -3.36288200 | -4.21496400 | -1.45843400 |
| C            | 4.75181100  | -1.05840000 | 0.08937800  | C | -2.97849400 | 0.04839500  | -1.30119100 |
| C            | 5.61009900  | 0.04117800  | 0.27652300  | H | -2.19684500 | -0.10710700 | -2.04493700 |
| C            | 5.29836800  | -2.35360400 | 0.19035800  | H | -3.75644400 | 0.65361800  | -1.77195900 |
| C            | 6.96354300  | -0.16300900 | 0.55628500  | N | -2.38174300 | 0.85827300  | -0.22848900 |
| C            | 6.64328900  | -2.55791000 | 0.46892400  | C | -3.25350500 | 1.55590900  | 0.72413400  |
| C            | 7.47833200  | -1.45562400 | 0.65317200  | H | -2.63417500 | 1.81156100  | 1.58635200  |
| H            | 7.61820700  | 0.68919800  | 0.69892900  | H | -4.01977700 | 0.85190900  | 1.06563800  |
| H            | 7.03637300  | -3.56745600 | 0.54161500  | C | -3.90160300 | 2.80338700  | 0.14914900  |
| H            | 8.53367700  | -1.59330900 | 0.87225200  | C | -3.11147200 | 3.82027800  | -0.40626700 |
| H            | 4.62771800  | -3.19240200 | 0.04274400  | C | -5.28956100 | 2.97472200  | 0.19578400  |
| I            | 5.01617700  | 2.10825800  | 0.15888800  | C | -3.70046200 | 4.97905900  | -0.90971000 |
| C            | 3.29505100  | -0.99350000 | -0.20585700 | H | -2.03111900 | 3.70249600  | -0.43181200 |
| O            | 2.63658300  | -2.08059100 | -0.38582900 | C | -5.88179900 | 4.13813000  | -0.30401800 |
| <b>13-ts</b> |             |             |             | H | -5.91106500 | 2.19331000  | 0.62720900  |
| Cu           | 1.25244800  | 0.81488400  | 0.26725400  | C | -5.08845900 | 5.14128400  | -0.86046400 |
| C            | -7.68826000 | -2.02717200 | -0.10743300 | H | -3.07624900 | 5.76011900  | -1.33576800 |
| C            | -6.72359000 | -2.97957200 | 0.22887700  | H | -6.96132900 | 4.25665400  | -0.26016000 |
| C            | -5.36641100 | -2.74682500 | 0.00977700  | H | -5.54615300 | 6.04581700  | -1.25200400 |
| C            | -4.94568300 | -1.51969700 | -0.57028200 | C | -1.04276000 | 0.89132900  | -0.08287200 |
| C            | -5.93323800 | -0.57061500 | -0.90137200 | O | -0.47608400 | 1.58304800  | 0.84867500  |
| C            | -7.28607800 | -0.81808800 | -0.67350800 | O | -0.25921600 | 0.22186800  | -0.86260800 |
| H            | -3.99912000 | -3.53115400 | 1.45559000  | O | 3.01718400  | 0.05991800  | -0.30153300 |

|           |             |             |             |   |             |             |             |
|-----------|-------------|-------------|-------------|---|-------------|-------------|-------------|
| C         | 5.01420400  | 0.64705800  | 0.96234400  | H | 1.55680600  | -1.93522600 | 0.11315700  |
| C         | 6.00848300  | 0.05346900  | 0.16337000  | H | 2.29893300  | -4.29808900 | -0.30151500 |
| C         | 5.40650100  | 1.24712900  | 2.17559100  | H | 4.71441900  | -4.84144500 | 0.30882400  |
| C         | 7.34261300  | 0.06239000  | 0.57745600  | H | 2.80561400  | -3.65657700 | 1.25967400  |
| C         | 6.73159200  | 1.25308200  | 2.59104100  | C | 2.89926400  | 0.09209300  | 1.02664900  |
| C         | 7.70284800  | 0.65612000  | 1.78712100  | H | 2.13869400  | -0.22004500 | 1.75019300  |
| H         | 8.10320500  | -0.39433100 | -0.04553300 | H | 3.63401900  | 0.68664500  | 1.57279200  |
| H         | 7.00406200  | 1.71971100  | 3.53284500  | N | 2.22039700  | 0.98900200  | 0.07849100  |
| H         | 8.74542400  | 0.65027300  | 2.09326000  | C | 3.04134600  | 1.81146400  | -0.81843300 |
| H         | 4.63228300  | 1.70579300  | 2.78008300  | H | 2.39386800  | 2.13004700  | -1.63785200 |
| I         | 5.66139800  | -0.88216600 | -1.74599400 | H | 3.82090800  | 1.16873900  | -1.24291000 |
| C         | 3.55845000  | 0.70044200  | 0.65735200  | C | 3.66459900  | 3.01217600  | -0.13053000 |
| O         | 2.78505800  | 1.40999200  | 1.39495500  | C | 2.85294400  | 3.96619600  | 0.50032200  |
| C         | -1.47261900 | -2.07941400 | 1.52045200  | C | 5.05104800  | 3.20066200  | -0.13627400 |
| F         | -1.62514800 | -3.22185100 | 2.20063500  | C | 3.41984100  | 5.08050300  | 1.11660600  |
| F         | -2.00600500 | -1.06980700 | 2.20923900  | H | 1.77392500  | 3.83356900  | 0.49670800  |
| F         | -0.16914500 | -1.85600600 | 1.31971300  | C | 5.62141300  | 4.31982000  | 0.47745200  |
| <b>14</b> |             |             |             | H | 5.68911100  | 2.46953000  | -0.62833900 |
| Cu        | -1.42631400 | 0.84982100  | -0.31769900 | C | 4.80663500  | 5.26046600  | 1.10712600  |
| C         | 7.64467300  | -2.14134200 | 0.91901700  | H | 2.77962500  | 5.81366800  | 1.60013700  |
| C         | 6.72422300  | -3.10192500 | 0.49324100  | H | 6.69997400  | 4.45290500  | 0.46349800  |
| C         | 5.37684800  | -2.80023600 | 0.30912200  | H | 5.24677400  | 6.13084700  | 1.58632000  |
| C         | 4.90466700  | -1.46988300 | 0.57047000  | C | 0.88117800  | 0.96023800  | -0.04883100 |
| C         | 5.86601600  | -0.51133000 | 1.01256100  | O | 0.25464700  | 1.74416100  | -0.86026100 |
| C         | 7.20237400  | -0.83802000 | 1.17635000  | O | 0.15097200  | 0.14064600  | 0.63799800  |
| H         | 4.53857900  | -4.02786600 | -1.23410700 | O | -3.12978600 | -0.05107600 | 0.21559100  |
| H         | 8.68954900  | -2.40647500 | 1.05269800  | C | -5.20425600 | 0.60202600  | -0.87667500 |
| H         | 7.06124100  | -4.11930200 | 0.30474300  | C | -6.14122400 | -0.09683300 | -0.09362700 |
| C         | 4.42857500  | -3.88767900 | -0.15097800 | C | -5.66658300 | 1.27664700  | -2.02413600 |
| C         | 3.52292000  | -1.13556900 | 0.40303600  | C | -7.48841300 | -0.11930100 | -0.46149700 |
| H         | 5.55911800  | 0.51210200  | 1.19803900  | C | -7.00494700 | 1.25090500  | -2.39427500 |
| H         | 7.90504400  | -0.07658100 | 1.50405100  | C | -7.91822900 | 0.54703300  | -1.60912300 |
| C         | 2.57763100  | -2.13801100 | -0.23080100 | H | -8.20490300 | -0.65675700 | 0.14910100  |
| C         | 2.96566900  | -3.57515800 | 0.17808000  | H | -7.33235800 | 1.77538200  | -3.28682000 |

|                    |             |             |             |   |             |             |             |
|--------------------|-------------|-------------|-------------|---|-------------|-------------|-------------|
| H                  | -8.96971800 | 0.51437800  | -1.88107600 | C | 3.67661400  | 2.33877800  | -1.19534000 |
| H                  | -4.93656600 | 1.81731900  | -2.61583700 | H | 3.01265600  | 2.89143300  | -1.86369500 |
| I                  | -5.68310500 | -1.14148000 | 1.73377100  | H | 4.54784100  | 2.01447500  | -1.77597400 |
| C                  | -3.74144400 | 0.69024500  | -0.62115500 | C | 4.11758400  | 3.21125800  | -0.03203500 |
| O                  | -3.03270800 | 1.53065700  | -1.28215100 | C | 3.16563700  | 3.91137400  | 0.72627700  |
| C                  | 2.49921300  | -1.99658100 | -1.75611400 | C | 5.47082500  | 3.32768700  | 0.30505700  |
| F                  | 1.73905300  | -2.97408800 | -2.29962600 | C | 3.56453200  | 4.70421100  | 1.80156200  |
| F                  | 3.71060200  | -2.05154900 | -2.35650600 | H | 2.11397500  | 3.83698200  | 0.46220600  |
| F                  | 1.93938900  | -0.81912600 | -2.12969600 | C | 5.87207000  | 4.12570700  | 1.38005900  |
| <b>MECP(14-15)</b> |             |             |             | H | 6.21940600  | 2.79714600  | -0.28079700 |
| Cu                 | -0.82872600 | 1.29751800  | -0.61950500 | C | 4.91897000  | 4.81392300  | 2.13115900  |
| C                  | 2.26729300  | -3.57498000 | 3.45011200  | H | 2.81824400  | 5.24352700  | 2.37888800  |
| C                  | 1.91392200  | -4.06339700 | 2.19153800  | H | 6.92720000  | 4.20853200  | 1.62727100  |
| C                  | 2.10575000  | -3.31272900 | 1.03248300  | H | 5.22817500  | 5.43689600  | 2.96626800  |
| C                  | 2.67677000  | -2.00071300 | 1.12788700  | C | 1.58290700  | 1.14549900  | -0.69676000 |
| C                  | 3.01438500  | -1.52298800 | 2.42797600  | O | 0.88381100  | 2.11981200  | -1.13641000 |
| C                  | 2.82105200  | -2.29378700 | 3.56181700  | O | 0.98840100  | 0.12430400  | -0.18111700 |
| H                  | 2.51723100  | -4.58910000 | -0.63334200 | O | -2.51888400 | 0.44977200  | -0.04262500 |
| H                  | 2.10399900  | -4.18265100 | 4.33578700  | C | -4.70699900 | 1.45125400  | -0.35702100 |
| H                  | 1.47213600  | -5.05371100 | 2.10498200  | C | -5.53547700 | 0.39538000  | 0.05581400  |
| C                  | 1.72108100  | -3.90764600 | -0.30325200 | C | -5.31901300 | 2.68309400  | -0.65977200 |
| C                  | 2.86961900  | -1.19977600 | -0.04829800 | C | -6.91667600 | 0.57369100  | 0.16645300  |
| H                  | 3.43107700  | -0.53040100 | 2.55052000  | C | -6.69046000 | 2.86942100  | -0.54658100 |
| H                  | 3.09293100  | -1.89642100 | 4.53570800  | C | -7.49309100 | 1.80834200  | -0.12878700 |
| C                  | 2.61618100  | -1.80805700 | -1.41736900 | H | -7.54406400 | -0.25196400 | 0.48204400  |
| C                  | 1.47482100  | -2.83813500 | -1.36825700 | H | -7.12891700 | 3.83414000  | -0.78402000 |
| H                  | 2.34046100  | -1.00789400 | -2.11129700 | H | -8.56838800 | 1.93222600  | -0.03365000 |
| H                  | 1.34451000  | -3.29594500 | -2.35293000 | H | -4.67149400 | 3.48782000  | -0.98771700 |
| H                  | 0.82321000  | -4.52453300 | -0.18139000 | I | -4.84971100 | -1.60062500 | 0.51456400  |
| H                  | 0.56087100  | -2.28448300 | -1.13410800 | C | -3.21541000 | 1.41790500  | -0.50396400 |
| C                  | 3.63510900  | 0.10445600  | -0.01689800 | O | -2.63034600 | 2.38460200  | -1.07660300 |
| H                  | 3.79946500  | 0.45589700  | 1.00483600  | C | 3.89681100  | -2.39623600 | -2.02861500 |
| H                  | 4.62596700  | -0.03729200 | -0.46745500 | F | 3.63484700  | -3.02881700 | -3.19174300 |
| N                  | 2.94188700  | 1.13460700  | -0.78797600 | F | 4.51667300  | -3.28284200 | -1.21708300 |

|                        |             |             |             |           |             |             |             |
|------------------------|-------------|-------------|-------------|-----------|-------------|-------------|-------------|
| F                      | 4.80351700  | -1.42511300 | -2.31006100 | H         | -6.64796400 | -1.65964200 | -0.51746700 |
| <b>MECP(14-15) iso</b> |             |             |             | C         | -5.46814900 | -4.15662200 | 1.46847600  |
| Cu                     | 0.46771100  | -0.98787200 | -1.21873800 | H         | -3.43926400 | -4.89352900 | 1.44857500  |
| C                      | -2.10799100 | 4.87817500  | -2.56980100 | H         | -7.39896100 | -3.21867500 | 1.25556000  |
| C                      | -1.46040100 | 4.87369000  | -1.33436600 | H         | -5.79534600 | -4.84189300 | 2.24582800  |
| C                      | -1.62340900 | 3.82821400  | -0.42652600 | C         | -1.88722700 | -0.57808300 | -1.18819300 |
| C                      | -2.48450800 | 2.73933100  | -0.75681600 | O         | -1.35728100 | -1.54569400 | -1.83056900 |
| C                      | -3.11684700 | 2.75528200  | -2.03018100 | O         | -1.10566400 | 0.26168600  | -0.59160600 |
| C                      | -2.93565700 | 3.80446500  | -2.91743100 | O         | 2.21193400  | -0.31059400 | -0.51140200 |
| H                      | 0.10980600  | 4.29087100  | 0.74855900  | C         | 4.27121300  | -1.57587900 | -0.71461000 |
| H                      | -1.95895800 | 5.70413600  | -3.25951100 | C         | 5.13984100  | -0.75082700 | 0.02044500  |
| H                      | -0.80443700 | 5.69922000  | -1.06821800 | C         | 4.81251600  | -2.73302600 | -1.30833600 |
| C                      | -0.89098100 | 3.86946700  | 0.89680500  | C         | 6.49392200  | -1.07304100 | 0.14270700  |
| C                      | -2.69247600 | 1.64951800  | 0.16457600  | C         | 6.15743300  | -3.05957900 | -1.18885200 |
| H                      | -3.74281700 | 1.92190600  | -2.32810800 | C         | 7.00321000  | -2.22198800 | -0.46131500 |
| H                      | -3.43283300 | 3.78770000  | -3.88289800 | H         | 7.15186500  | -0.42747600 | 0.71296400  |
| C                      | -2.18017000 | 1.83809900  | 1.58256700  | H         | 6.54198100  | -3.96079400 | -1.65742100 |
| C                      | -0.78568000 | 2.49635100  | 1.56075600  | H         | 8.05942900  | -2.45644700 | -0.35605000 |
| H                      | -0.09548900 | 1.85143000  | 1.01036400  | H         | 4.13115300  | -3.36535400 | -1.86607600 |
| H                      | -1.41223100 | 4.56055700  | 1.57877800  | I         | 4.56066500  | 1.05230800  | 1.06097400  |
| H                      | -0.41068300 | 2.60291100  | 2.58126900  | C         | 2.80582500  | -1.35721300 | -0.93583200 |
| C                      | -3.73285300 | 0.59002900  | -0.15111000 | O         | 2.13505000  | -2.23602900 | -1.56337300 |
| H                      | -4.06050100 | 0.07359200  | 0.75223700  | H         | -2.86415500 | 2.54383800  | 2.08831700  |
| H                      | -4.62546900 | 1.05978800  | -0.58661700 | C         | -2.21920000 | 0.61397900  | 2.50292400  |
| N                      | -3.22945500 | -0.39336700 | -1.11675200 | F         | -1.60708400 | 0.89108900  | 3.67503200  |
| C                      | -4.14712600 | -1.42419400 | -1.61614800 | F         | -3.49952900 | 0.27694100  | 2.81950400  |
| H                      | -3.60850300 | -1.95386400 | -2.40533300 | F         | -1.63561200 | -0.48521900 | 1.99426900  |
| H                      | -5.00584400 | -0.91781300 | -2.07342300 | <b>15</b> |             |             |             |
| C                      | -4.61953500 | -2.38860600 | -0.54116100 | Cu        | -1.14688000 | 1.28200800  | -1.17679300 |
| C                      | -3.72173100 | -3.30876500 | 0.02199200  | C         | 2.61136100  | -0.77508400 | 4.17401900  |
| C                      | -5.94233500 | -2.36668800 | -0.08574300 | C         | 2.20117300  | -1.97206200 | 3.59590600  |
| C                      | -4.14363200 | -4.18464100 | 1.02113600  | C         | 2.18605100  | -2.14715000 | 2.20545300  |
| H                      | -2.69425400 | -3.33657300 | -0.33139000 | C         | 2.61121300  | -1.08707200 | 1.38292400  |
| C                      | -6.36763700 | -3.24655200 | 0.91327700  | C         | 3.01068700  | 0.12296400  | 1.97475000  |

|   |            |             |             |           |             |             |             |
|---|------------|-------------|-------------|-----------|-------------|-------------|-------------|
| C | 3.01399900 | 0.28262200  | 3.35658000  | O         | 1.30927200  | -0.51990700 | -0.57335000 |
| H | 2.52672300 | -4.21868800 | 1.76481000  | O         | -2.97008600 | 1.14057900  | -0.88164900 |
| H | 2.60674000 | -0.66306700 | 5.25457700  | C         | -4.75535700 | 1.39249600  | 0.67247900  |
| H | 1.87392000 | -2.79306900 | 4.22963600  | C         | -5.64206600 | 0.38642300  | 0.26876800  |
| C | 1.72818700 | -3.47492800 | 1.63688600  | C         | -5.26667100 | 2.41205700  | 1.49548000  |
| C | 2.56459100 | -1.19426000 | -0.13822700 | C         | -6.98527700 | 0.40300000  | 0.65238300  |
| H | 3.31392500 | 0.96236100  | 1.35596600  | C         | -6.60550100 | 2.45405100  | 1.86855900  |
| H | 3.32437700 | 1.22857600  | 3.79029300  | C         | -7.47035600 | 1.44559500  | 1.44197300  |
| C | 2.41321900 | -2.64523700 | -0.65994500 | H         | -7.65073700 | -0.39404200 | 0.33899600  |
| C | 1.33926500 | -3.38097700 | 0.15993700  | H         | -6.97044900 | 3.26389000  | 2.49439200  |
| H | 2.08679300 | -2.57952800 | -1.70361200 | H         | -8.51913300 | 1.45727500  | 1.72705900  |
| H | 1.16923800 | -4.37562800 | -0.26011800 | H         | -4.56720200 | 3.16911900  | 1.83431600  |
| H | 0.87501200 | -3.84448700 | 2.21690400  | I         | -5.03592200 | -1.34728300 | -0.88075500 |
| H | 0.40554900 | -2.81940000 | 0.05421100  | C         | -3.28384700 | 1.50728800  | 0.32229700  |
| C | 3.65962700 | -0.36267600 | -0.87739300 | O         | -2.50477200 | 1.97233200  | 1.16139400  |
| H | 4.46804300 | -0.06631100 | -0.20514900 | C         | 3.74076500  | -3.41306800 | -0.69789300 |
| H | 4.09429800 | -0.90684500 | -1.71989200 | F         | 3.54260700  | -4.74483100 | -0.74669900 |
| N | 2.91485700 | 0.79313200  | -1.35690900 | F         | 4.52414400  | -3.15824700 | 0.37410100  |
| C | 3.52774800 | 1.93235200  | -2.04068900 | F         | 4.47035000  | -3.09293800 | -1.79845900 |
| H | 2.70366200 | 2.50347000  | -2.47597000 | <b>16</b> |             |             |             |
| H | 4.14363500 | 1.54867200  | -2.86354600 | Cu        | 2.49145400  | 0.07306900  | -0.25335400 |
| C | 4.36196800 | 2.79595200  | -1.11389000 | O         | 0.64493400  | 0.06609500  | -0.50297400 |
| C | 3.73641500 | 3.57604800  | -0.12966000 | C         | -1.30913300 | 1.33523500  | 0.03885600  |
| C | 5.75594700 | 2.82713500  | -1.22383200 | C         | -2.30625400 | 0.35171800  | -0.02895000 |
| C | 4.49620500 | 4.36785500  | 0.73060700  | C         | -1.72282800 | 2.68005300  | 0.04361600  |
| H | 2.65182000 | 3.56883700  | -0.04537400 | C         | -3.65765100 | 0.69804100  | -0.10543000 |
| C | 6.51832500 | 3.62291700  | -0.36445000 | C         | -3.06287200 | 3.03761100  | -0.05000900 |
| H | 6.24942900 | 2.23273900  | -1.98995900 | C         | -4.03537500 | 2.04048800  | -0.12838400 |
| C | 5.88952000 | 4.39235800  | 0.61456300  | H         | -4.41468200 | -0.07717400 | -0.14449300 |
| H | 4.00103900 | 4.97275600  | 1.48510400  | H         | -3.34699300 | 4.08623100  | -0.05506800 |
| H | 7.60027200 | 3.64040800  | -0.46201000 | H         | -5.08895700 | 2.29802300  | -0.19789800 |
| H | 6.48028500 | 5.01295400  | 1.28256900  | H         | -0.94701500 | 3.43353800  | 0.12743000  |
| C | 1.59004200 | 0.63012900  | -1.19674000 | I         | -1.91721100 | -1.77437100 | 0.08653100  |
| O | 0.71244400 | 1.42544600  | -1.57182100 | C         | 0.18519900  | 1.11565400  | 0.10532900  |

|                    |             |             |             |   |             |             |             |
|--------------------|-------------|-------------|-------------|---|-------------|-------------|-------------|
| O                  | 0.89639300  | 1.95032200  | 0.68444900  | H | -4.06094200 | 2.76049600  | 1.64112700  |
| C                  | 6.90805500  | -0.09423100 | 0.25448200  | C | -3.37719200 | 3.16171400  | -0.36024600 |
| H                  | 7.18363500  | -0.93453300 | 0.89947900  | C | -2.29563500 | 3.52602700  | -1.17579800 |
| H                  | 7.24272800  | 0.83789100  | 0.72062200  | C | -4.67601200 | 3.25458600  | -0.87268600 |
| H                  | 7.40657600  | -0.20854600 | -0.71320000 | C | -2.51356500 | 3.96321300  | -2.48270500 |
| C                  | 5.46387100  | -0.06324000 | 0.06953700  | H | -1.28548100 | 3.46067100  | -0.78013500 |
| N                  | 4.31657700  | -0.03601200 | -0.07454800 | C | -4.89590400 | 3.69640000  | -2.17905300 |
| <b>MECP(12-17)</b> |             |             |             | H | -5.52210600 | 2.97761600  | -0.24730400 |
| Cu                 | 0.92199800  | 0.46454400  | 1.50986400  | C | -3.81409900 | 4.04969400  | -2.98707900 |
| C                  | -6.85088200 | -3.73834500 | 0.11959600  | H | -1.66813300 | 4.24082800  | -3.10665000 |
| C                  | -5.99104200 | -3.58940600 | -0.97180100 | H | -5.90986200 | 3.76300700  | -2.56468200 |
| C                  | -5.03845800 | -2.57232600 | -1.00778300 | H | -3.98289700 | 4.39240600  | -4.00439100 |
| C                  | -4.94077700 | -1.66324900 | 0.07440600  | C | -1.35197400 | 1.03727900  | 1.29236300  |
| C                  | -5.80178000 | -1.83372700 | 1.17090100  | O | -0.46941400 | 1.96789200  | 1.24154300  |
| C                  | -6.74918200 | -2.85912400 | 1.19533800  | O | -0.91338000 | -0.17291700 | 1.46455500  |
| H                  | -3.12642200 | -2.96299800 | -1.87820600 | O | 2.39008800  | -0.61532600 | 0.31287800  |
| H                  | -7.59034700 | -4.53468500 | 0.12637800  | C | 4.57319000  | 0.43968600  | 0.18638800  |
| H                  | -6.05769700 | -4.27869600 | -1.81071200 | C | 5.13855100  | -0.22500100 | -0.91608700 |
| C                  | -4.05946100 | -2.44681000 | -2.15450800 | C | 5.40811900  | 1.25861700  | 0.97114100  |
| C                  | -3.94982400 | -0.56168500 | -0.00465500 | C | 6.49425600  | -0.07248000 | -1.21383200 |
| H                  | -5.74768200 | -1.15856700 | 2.01922200  | C | 6.76151500  | 1.39756900  | 0.68841200  |
| H                  | -7.40773600 | -2.96409200 | 2.05327000  | C | 7.30506800  | 0.72871200  | -0.40881200 |
| C                  | -3.39096500 | -0.24260900 | -1.18461800 | H | 6.91859300  | -0.57798400 | -2.07436100 |
| C                  | -3.72870500 | -0.98082500 | -2.45421600 | H | 7.38639400  | 2.02383600  | 1.31814900  |
| H                  | -2.70660200 | 0.59663300  | -1.25216000 | H | 8.36046800  | 0.82776100  | -0.64742400 |
| H                  | -2.89579900 | -0.91923800 | -3.16357100 | H | 4.96152300  | 1.77524700  | 1.81341800  |
| H                  | -4.44694500 | -2.95255300 | -3.04609200 | I | 4.02724800  | -1.46946600 | -2.27870700 |
| H                  | -4.58539200 | -0.48866200 | -2.94396100 | C | 1.36488100  | -0.65014700 | 3.23960000  |
| C                  | -3.63439100 | 0.18320700  | 1.28365800  | F | 0.80663800  | -1.85194600 | 3.14868400  |
| H                  | -4.55233100 | 0.61588200  | 1.69970800  | F | 0.80873900  | 0.03975700  | 4.24586200  |
| H                  | -3.25732600 | -0.52709000 | 2.02747000  | F | 2.67320300  | -0.77786000 | 3.45834500  |
| N                  | -2.67259700 | 1.28462600  | 1.18170100  | C | 3.15013100  | 0.33969500  | 0.61890000  |
| C                  | -3.13679300 | 2.68142500  | 1.05885900  | O | 2.67938700  | 1.27778200  | 1.37641000  |
| H                  | -2.38228500 | 3.30614800  | 1.54121100  |   |             |             |             |

17



|    |             |             |             |          |             |             |             |
|----|-------------|-------------|-------------|----------|-------------|-------------|-------------|
| Cu | -0.60525100 | 1.71321700  | 0.80581500  | C        | 2.20504900  | -5.12342300 | 0.09620900  |
| C  | 7.85728000  | 1.65267000  | -1.22751500 | H        | 0.18288400  | -4.59133500 | -0.43947200 |
| C  | 6.92781000  | 1.22311000  | -2.17871300 | H        | 4.21872000  | -5.39401900 | 0.82088600  |
| C  | 5.69056100  | 0.70556900  | -1.79727400 | H        | 2.21652000  | -6.02309300 | -0.51322700 |
| C  | 5.36794400  | 0.60539400  | -0.42199800 | C        | 1.18731100  | 0.42529500  | 1.46143600  |
| C  | 6.30844300  | 1.04744300  | 0.52286500  | O        | -0.00282300 | 0.04395400  | 1.74759600  |
| C  | 7.54247700  | 1.56613800  | 0.12704100  | O        | 1.27518900  | 1.57654500  | 0.84571400  |
| H  | 3.97452400  | 1.15543600  | -2.98770200 | O        | -2.16397900 | 0.46169100  | -0.81876800 |
| H  | 8.81684500  | 2.05169500  | -1.54507100 | C        | -4.39912200 | 0.88054400  | -0.00391200 |
| H  | 7.16599800  | 1.29547000  | -3.23781700 | C        | -5.11053000 | -0.26117100 | -0.40312600 |
| C  | 4.65087400  | 0.30239500  | -2.82036600 | C        | -5.13198800 | 2.02252500  | 0.36865000  |
| C  | 4.05955900  | 0.02539000  | -0.03428900 | C        | -6.50578100 | -0.25527300 | -0.43628100 |
| H  | 6.08981300  | 0.98359900  | 1.58457400  | C        | -6.52184900 | 2.04022300  | 0.32142800  |
| H  | 8.25385100  | 1.89789800  | 0.87858300  | C        | -7.20999400 | 0.89685800  | -0.08328400 |
| C  | 3.34106500  | -0.67672500 | -0.92665700 | H        | -7.04403700 | -1.14762600 | -0.73572400 |
| C  | 3.81502700  | -0.89023700 | -2.34130100 | H        | -7.06272200 | 2.93891400  | 0.60287900  |
| H  | 2.40860500  | -1.14471100 | -0.62788900 | H        | -8.29586100 | 0.89072800  | -0.12176300 |
| H  | 2.95917400  | -1.04214300 | -3.00851600 | H        | -4.58092600 | 2.90058400  | 0.68675400  |
| H  | 5.12580200  | 0.08486600  | -3.78384700 | I        | -4.17100200 | -2.13410300 | -0.91262300 |
| H  | 4.41035400  | -1.81694700 | -2.38930900 | C        | -0.69649800 | 3.47893500  | 0.01114600  |
| C  | 3.60911900  | 0.24623400  | 1.40105600  | F        | 0.47737100  | 3.77477400  | -0.54740200 |
| H  | 4.31893400  | -0.21802900 | 2.09566200  | F        | -0.93279300 | 4.33418800  | 1.01736600  |
| H  | 3.61644600  | 1.32046200  | 1.61766800  | F        | -1.65232400 | 3.60036700  | -0.90881400 |
| N  | 2.28734000  | -0.28131300 | 1.75798000  | C        | -2.90152500 | 0.98915900  | 0.00819000  |
| C  | 2.15168900  | -1.54267900 | 2.51703900  | O        | -2.44155800 | 1.75114700  | 0.98660000  |
| H  | 1.21138600  | -1.47473700 | 3.06824900  | <b>8</b> |             |             |             |
| H  | 2.96788000  | -1.56370300 | 3.24696900  | Cu       | -1.14913800 | 0.69404900  | -0.28409600 |
| C  | 2.17341300  | -2.80086900 | 1.67086500  | N        | -1.85112600 | 2.38698000  | -0.50012300 |
| C  | 1.04422000  | -3.16613800 | 0.92223400  | C        | -2.30666600 | 3.43891900  | -0.66469100 |
| C  | 3.31077700  | -3.61426800 | 1.62761700  | C        | -2.88096400 | 4.75956900  | -0.88379900 |
| C  | 1.06287800  | -4.31861000 | 0.13686800  | H        | -3.75474000 | 4.68233300  | -1.53887900 |
| H  | 0.15455100  | -2.54252200 | 0.95664800  | H        | -3.19023300 | 5.20066300  | 0.06924900  |
| C  | 3.32873400  | -4.77085300 | 0.84469000  | H        | -2.14152200 | 5.41510100  | -1.35495200 |
| H  | 4.18869100  | -3.34392100 | 2.21079300  | C        | 6.02594500  | -0.54357700 | -1.02397600 |

|   |             |             |             |             |             |             |             |
|---|-------------|-------------|-------------|-------------|-------------|-------------|-------------|
| C | 5.68527700  | 0.06580500  | 0.18616300  | H           | -5.79357900 | -1.27594000 | -1.57329800 |
| C | 4.36260000  | 0.11023300  | 0.62652600  | H           | -6.54790500 | -1.00044800 | 0.78286900  |
| C | 3.33368500  | -0.46479600 | -0.16240700 | <b>9-ts</b> |             |             |             |
| C | 3.69565200  | -1.07749700 | -1.37433400 | Cu          | -0.45998200 | 0.61253200  | 0.19365800  |
| C | 5.02346300  | -1.11818800 | -1.80258700 | N           | -0.30447700 | 2.24478300  | 1.05014800  |
| H | 3.96784400  | -0.08432300 | 2.72014700  | C           | -0.19541100 | 3.25207100  | 1.60863900  |
| H | 7.06209500  | -0.56661400 | -1.35164000 | C           | -0.05539900 | 4.51929500  | 2.31320900  |
| H | 6.46191000  | 0.51287200  | 0.80383100  | H           | -0.78348400 | 5.24215100  | 1.93177100  |
| C | 4.00548900  | 0.71794200  | 1.96566700  | H           | -0.22779200 | 4.37270700  | 3.38422300  |
| C | 1.92809000  | -0.39283100 | 0.32045900  | H           | 0.95315900  | 4.91849900  | 2.16621000  |
| H | 2.93303800  | -1.52499400 | -2.00231700 | C           | 4.27860100  | 1.85656600  | -1.49588600 |
| H | 5.26897300  | -1.59737100 | -2.74701000 | C           | 4.74369400  | 0.90986100  | -0.57934900 |
| C | 1.61404700  | 0.48071100  | 1.29746300  | C           | 3.95915000  | -0.18277100 | -0.20688500 |
| C | 2.63493500  | 1.40133100  | 1.91950400  | C           | 2.66201500  | -0.33562400 | -0.75412300 |
| H | 0.58891500  | 0.51952400  | 1.65433500  | C           | 2.21511800  | 0.61444600  | -1.68921400 |
| H | 2.32401200  | 1.69096600  | 2.93061800  | C           | 3.01138600  | 1.70048100  | -2.05693100 |
| H | 4.78618700  | 1.41693600  | 2.28895100  | H           | 4.94776700  | -2.05171000 | 0.08043800  |
| H | 2.70473300  | 2.33701700  | 1.33925600  | H           | 4.90545300  | 2.69978500  | -1.77456900 |
| C | 0.89259200  | -1.33275600 | -0.27832300 | H           | 5.73947700  | 1.01464900  | -0.15276100 |
| H | 1.07349500  | -1.41929100 | -1.36768200 | C           | 4.50187700  | -1.26189000 | 0.70632800  |
| H | 1.11781500  | -2.34508200 | 0.11557300  | C           | 1.82638800  | -1.48885500 | -0.33416300 |
| N | -0.48942400 | -1.00191200 | 0.00379300  | H           | 1.22939900  | 0.50652200  | -2.13019800 |
| C | -1.35674600 | -2.13257900 | -0.29168400 | H           | 2.63975000  | 2.41965700  | -2.78266700 |
| H | -1.04971100 | -3.00666100 | 0.31695500  | C           | 2.19103500  | -2.21875100 | 0.73839800  |
| H | -1.27951500 | -2.47158000 | -1.34636400 | C           | 3.40450800  | -1.89346200 | 1.57070900  |
| C | -2.81161400 | -1.82700100 | 0.00184400  | H           | 1.56343900  | -3.05084800 | 1.05128100  |
| C | -3.25154700 | -1.66989300 | 1.32522800  | H           | 3.78742400  | -2.79419400 | 2.06490400  |
| C | -3.74544400 | -1.67928700 | -1.03139500 | H           | 5.31193900  | -0.86539600 | 1.32976600  |
| C | -4.58523400 | -1.37196500 | 1.60608800  | H           | 3.11352300  | -1.20209400 | 2.37966400  |
| H | -2.53428100 | -1.78227400 | 2.13429100  | C           | 0.54564300  | -1.81680400 | -1.07647200 |
| C | -5.08344000 | -1.38113900 | -0.75641800 | H           | 0.69127300  | -1.62394300 | -2.15613400 |
| H | -3.41835600 | -1.80504500 | -2.06159600 | H           | 0.35693900  | -2.89996600 | -0.99131600 |
| C | -5.50695500 | -1.22591600 | 0.56442600  | N           | -0.62900200 | -1.08904600 | -0.57449100 |
| H | -4.90930200 | -1.26118800 | 2.63825800  | C           | -1.76717700 | -1.36486400 | -1.45789900 |

|           |             |             |             |           |             |             |             |
|-----------|-------------|-------------|-------------|-----------|-------------|-------------|-------------|
| H         | -1.98360200 | -2.44728900 | -1.44281300 | C         | 1.80493800  | -0.58623900 | -0.12537900 |
| H         | -1.51640200 | -1.11826800 | -2.50787700 | H         | 2.98273500  | -1.73348400 | -2.34570000 |
| C         | -3.01508900 | -0.60227500 | -1.06621600 | H         | 4.79137800  | -3.39409500 | -2.39069100 |
| C         | -3.94568200 | -1.14789500 | -0.17151500 | C         | 1.58117100  | 0.08000200  | 1.01986600  |
| C         | -3.26076200 | 0.67797400  | -1.58479400 | C         | 2.38730900  | -0.17704600 | 2.26764400  |
| C         | -5.08201300 | -0.42960200 | 0.20701100  | H         | 0.82422100  | 0.85708300  | 1.04680700  |
| H         | -3.77752100 | -2.14625000 | 0.22447400  | H         | 1.80116200  | 0.07500300  | 3.15932200  |
| C         | -4.39664500 | 1.39971100  | -1.21189200 | H         | 3.54571300  | -1.80108400 | 3.15104900  |
| H         | -2.55900500 | 1.10387500  | -2.29947900 | H         | 3.26609300  | 0.48916400  | 2.28176700  |
| C         | -5.30975100 | 0.84756000  | -0.31009500 | C         | 1.01005000  | -0.32414900 | -1.39733000 |
| H         | -5.79324100 | -0.87093000 | 0.90070800  | H         | 1.69118700  | 0.02522800  | -2.18503600 |
| H         | -4.57458300 | 2.38620500  | -1.63347800 | H         | 0.58412400  | -1.27148600 | -1.74396200 |
| H         | -6.19793000 | 1.40398300  | -0.02151700 | N         | -0.06792500 | 0.65283100  | -1.30356600 |
| C         | -1.13964800 | -2.15569400 | 1.43480600  | C         | 0.13220400  | 2.02304500  | -1.78807500 |
| O         | -1.06474100 | -1.25849600 | 2.20788400  | H         | -0.83038200 | 2.35737700  | -2.18255600 |
| O         | -1.30815700 | -3.25745500 | 1.03357900  | H         | 0.84551900  | 1.98196900  | -2.62029100 |
| <b>10</b> |             |             |             | C         | 0.62534900  | 3.02081900  | -0.75239800 |
| Cu        | -3.31254000 | -1.04189800 | -0.16929800 | C         | 1.92513300  | 3.53496500  | -0.80700700 |
| N         | -5.06272500 | -1.30995500 | 0.31032800  | C         | -0.23112200 | 3.45397100  | 0.27231300  |
| C         | -6.17640900 | -1.42500500 | 0.60263700  | C         | 2.37063700  | 4.45869400  | 0.14224200  |
| C         | -7.57855600 | -1.56838800 | 0.96995400  | H         | 2.59713900  | 3.21029800  | -1.59902100 |
| H         | -7.66704800 | -2.15857700 | 1.88760600  | C         | 0.21276200  | 4.37347100  | 1.22249000  |
| H         | -8.02317100 | -0.58204100 | 1.13633600  | H         | -1.24174800 | 3.05644400  | 0.30977300  |
| H         | -8.12508900 | -2.07404000 | 0.16753800  | C         | 1.51491600  | 4.87941000  | 1.16073300  |
| C         | 4.95980100  | -3.51179500 | -0.24347400 | H         | 3.38435100  | 4.84740300  | 0.08496600  |
| C         | 4.46024500  | -3.04156000 | 0.97429300  | H         | -0.46057200 | 4.70216100  | 2.01054900  |
| C         | 3.43053700  | -2.10242600 | 1.01818900  | H         | 1.85784300  | 5.59852700  | 1.90039200  |
| C         | 2.88028300  | -1.60553100 | -0.18896100 | C         | -1.33419400 | 0.26278300  | -0.92064300 |
| C         | 3.38709700  | -2.09349400 | -1.40492300 | O         | -1.48420600 | -0.99797100 | -0.61829900 |
| C         | 4.41620600  | -3.03644900 | -1.43521200 | O         | -2.28071300 | 1.08682300  | -0.87149700 |
| H         | 1.95300400  | -2.26381400 | 2.55172800  | <b>11</b> |             |             |             |
| H         | 5.76425000  | -4.24257200 | -0.25732700 | Cu        | -0.07653100 | -1.05360900 | -0.64707700 |
| H         | 4.87499000  | -3.41460200 | 1.90876600  | C         | -5.65211500 | 5.37183900  | -0.42360700 |
| C         | 2.83528300  | -1.64187300 | 2.33115000  | C         | -5.36891700 | 4.78135700  | 0.81133700  |

|   |             |             |             |                    |             |             |             |
|---|-------------|-------------|-------------|--------------------|-------------|-------------|-------------|
| C | -5.03188300 | 3.43167800  | 0.90678400  | H                  | -7.78753500 | -3.79703000 | 2.67645000  |
| C | -4.98080300 | 2.63449600  | -0.26347900 | C                  | -2.62336400 | -1.35331800 | -1.05316900 |
| C | -5.25912000 | 3.24439000  | -1.49820700 | O                  | -2.32410400 | -2.56073600 | -0.98894500 |
| C | -5.59169300 | 4.59785400  | -1.58077600 | O                  | -1.77480700 | -0.36599100 | -0.92671100 |
| H | -3.55634400 | 2.83945000  | 2.33216000  | O                  | 2.72875200  | 0.23848800  | -0.25910800 |
| H | -5.91547000 | 6.42510600  | -0.47741400 | C                  | 3.99715600  | -1.75055100 | -0.04334800 |
| H | -5.40591500 | 5.38165500  | 1.71853200  | C                  | 5.19056600  | -1.06195600 | 0.11002900  |
| C | -4.65289700 | 2.80333100  | 2.23045800  | C                  | 4.06254800  | -3.15186500 | -0.01103600 |
| C | -4.65070000 | 1.19379600  | -0.14324800 | C                  | 6.42787200  | -1.65512100 | 0.28904000  |
| H | -5.22347200 | 2.65989200  | -2.41195800 | C                  | 5.28357500  | -3.79681200 | 0.16773600  |
| H | -5.80581900 | 5.04172600  | -2.54979900 | C                  | 6.45737900  | -3.05506900 | 0.31621000  |
| C | -4.70772800 | 0.59359700  | 1.05771400  | H                  | 7.34219300  | -1.09017800 | 0.40419300  |
| C | -5.09521500 | 1.33763800  | 2.31022000  | H                  | 5.32196100  | -4.88137600 | 0.19097700  |
| H | -4.50987700 | -0.47079500 | 1.13119500  | H                  | 7.41115400  | -3.55542000 | 0.45493500  |
| H | -4.65137200 | 0.85944900  | 3.19148800  | H                  | 3.13576400  | -3.70277700 | -0.13013300 |
| H | -5.06576600 | 3.38570600  | 3.06298400  | I                  | 4.92509600  | 1.12381100  | 0.03958600  |
| H | -6.18778900 | 1.27902300  | 2.44923300  | C                  | 7.14660600  | 1.56741100  | 0.35589000  |
| C | -4.28667700 | 0.44381800  | -1.41821100 | F                  | 7.23837600  | 2.89784800  | 0.36034600  |
| H | -5.13156400 | 0.49860300  | -2.11931400 | F                  | 7.90041000  | 1.07427300  | -0.62886400 |
| H | -3.44530000 | 0.95676300  | -1.89554800 | F                  | 7.59028400  | 1.08816400  | 1.51969500  |
| N | -3.93986400 | -0.96202800 | -1.27318400 | C                  | 2.69015200  | -1.03298000 | -0.23898700 |
| C | -4.93283200 | -1.99817000 | -1.56652000 | O                  | 1.66099300  | -1.73823500 | -0.36889000 |
| H | -4.38671000 | -2.83809200 | -2.00335800 | <b>MECP(11-12)</b> |             |             |             |
| H | -5.61894200 | -1.60360500 | -2.32653600 | Cu                 | 0.07821100  | -1.34248200 | -0.51645600 |
| C | -5.73910100 | -2.49392900 | -0.37569100 | C                  | -5.85490300 | 5.26257500  | -0.44970500 |
| C | -5.12226200 | -3.27169600 | 0.61753400  | C                  | -5.52536200 | 4.70619000  | 0.79046500  |
| C | -7.10150800 | -2.20110300 | -0.25224200 | C                  | -5.07784500 | 3.38836300  | 0.89557100  |
| C | -5.85609600 | -3.73376800 | 1.71002200  | C                  | -4.95550900 | 2.59240600  | -0.27176100 |
| H | -4.06478800 | -3.50031400 | 0.51600400  | C                  | -5.28414000 | 3.16798400  | -1.51160700 |
| C | -7.83912700 | -2.66607100 | 0.84000300  | C                  | -5.73020200 | 4.48858900  | -1.60307800 |
| H | -7.59162600 | -1.60194700 | -1.01737900 | H                  | -3.57512700 | 2.90576000  | 2.33850300  |
| C | -7.21697700 | -3.43316000 | 1.82544500  | H                  | -6.20620300 | 6.28981200  | -0.51054800 |
| H | -5.36669200 | -4.33580700 | 2.47210600  | H                  | -5.61368000 | 5.30750800  | 1.69397900  |
| H | -8.89705000 | -2.42771400 | 0.91986400  | C                  | -4.66574400 | 2.79385200  | 2.22532000  |

|   |             |             |             |           |             |             |             |
|---|-------------|-------------|-------------|-----------|-------------|-------------|-------------|
| C | -4.49716100 | 1.18727400  | -0.14010700 | C         | 6.33077000  | -1.31117200 | 0.24290500  |
| H | -5.20200400 | 2.58204500  | -2.42238700 | C         | 5.63787200  | -3.63580900 | 0.21252100  |
| H | -5.98039300 | 4.90630000  | -2.57533500 | C         | 6.64271200  | -2.67249400 | 0.30139500  |
| C | -4.52500200 | 0.58590800  | 1.06266900  | H         | 7.12031600  | -0.57712400 | 0.30893800  |
| C | -5.00746100 | 1.30140300  | 2.29987600  | H         | 5.88689000  | -4.69105900 | 0.25955200  |
| H | -4.22869800 | -0.45464300 | 1.15264200  | H         | 7.68046400  | -2.97014200 | 0.41689800  |
| H | -4.56277600 | 0.85640900  | 3.19801700  | H         | 3.51088800  | -3.96845600 | -0.01373800 |
| H | -5.12830900 | 3.34695900  | 3.05180900  | I         | 4.43372800  | 1.14985100  | 0.00251300  |
| H | -6.09822100 | 1.16817900  | 2.39865300  | C         | 6.84857900  | 1.98727600  | 0.31887000  |
| C | -4.02396700 | 0.48856100  | -1.40646200 | F         | 6.71362200  | 3.31138000  | 0.26533200  |
| H | -4.83449100 | 0.48327000  | -2.14791800 | F         | 7.66854400  | 1.57983500  | -0.65515500 |
| H | -3.20321400 | 1.07008500  | -1.84089800 | F         | 7.36332300  | 1.63434400  | 1.49916900  |
| N | -3.57391800 | -0.89221200 | -1.26536300 | C         | 2.53380400  | -1.50509000 | -0.17507900 |
| C | -4.47497900 | -2.00587900 | -1.59316500 | O         | 1.66737300  | -2.42972900 | -0.24797700 |
| H | -3.84934500 | -2.80518300 | -1.99756000 | <b>12</b> |             |             |             |
| H | -5.14558100 | -1.66584900 | -2.39148900 | Cu        | 0.99827500  | -0.98049400 | -0.66127100 |
| C | -5.29659900 | -2.53949000 | -0.43240800 | C         | -5.83050200 | 4.71617700  | -0.26983200 |
| C | -4.67360500 | -3.25396100 | 0.60326100  | C         | -5.34218800 | 4.20578000  | 0.93602700  |
| C | -6.68099300 | -2.34516300 | -0.38192900 | C         | -4.67031000 | 2.98494900  | 0.98437800  |
| C | -5.42389700 | -3.74988400 | 1.66923200  | C         | -4.48305600 | 2.24060500  | -0.20594900 |
| H | -3.59917200 | -3.41165000 | 0.56049700  | C         | -4.97198200 | 2.76965300  | -1.41173500 |
| C | -7.43502300 | -2.84704200 | 0.68241700  | C         | -5.63983700 | 3.99500500  | -1.44665300 |
| H | -7.17487400 | -1.79585100 | -1.18152300 | H         | -3.02090400 | 2.77446300  | 2.32482200  |
| C | -6.80704400 | -3.54824600 | 1.71236800  | H         | -6.35258900 | 5.66910100  | -0.28642600 |
| H | -4.92963400 | -4.30274600 | 2.46430600  | H         | -5.48098800 | 4.76900800  | 1.85654500  |
| H | -8.51059100 | -2.69014700 | 0.70435900  | C         | -4.07535300 | 2.46053900  | 2.27329600  |
| H | -7.39067600 | -3.93956800 | 2.54202100  | C         | -3.79168100 | 0.93080000  | -0.13100800 |
| C | -2.26287700 | -1.15936000 | -0.98271700 | H         | -4.84092500 | 2.22433200  | -2.34130900 |
| O | -1.83456900 | -2.35541100 | -0.91351200 | H         | -6.01039800 | 4.38000600  | -2.39294100 |
| O | -1.44719200 | -0.17241300 | -0.78880700 | C         | -3.63083300 | 0.32074100  | 1.05524500  |
| O | 2.19570200  | -0.28484200 | -0.25400700 | C         | -4.12814400 | 0.92986300  | 2.34121600  |
| C | 3.96898600  | -1.88346600 | -0.00131000 | H         | -3.16781600 | -0.65978900 | 1.10130000  |
| C | 4.99968300  | -0.95064900 | 0.09501400  | H         | -3.53228300 | 0.57014200  | 3.18794600  |
| C | 4.31261800  | -3.24258200 | 0.06129800  | H         | -4.57910000 | 2.90813900  | 3.13778200  |

|   |             |             |             |              |             |             |             |
|---|-------------|-------------|-------------|--------------|-------------|-------------|-------------|
| H | -5.16106400 | 0.59250000  | 2.52822700  | C            | 3.29505100  | -0.99350000 | -0.20585700 |
| C | -3.31060700 | 0.32779300  | -1.44167600 | O            | 2.63658300  | -2.08059100 | -0.38582900 |
| H | -4.16205600 | 0.16708000  | -2.11391900 | <b>13-ts</b> |             |             |             |
| H | -2.64568400 | 1.04204700  | -1.93935700 | Cu           | 1.25244800  | 0.81488400  | 0.26725400  |
| N | -2.60991800 | -0.95521900 | -1.35055700 | C            | -7.68826000 | -2.02717200 | -0.10743300 |
| C | -3.30985700 | -2.21815200 | -1.65367100 | C            | -6.72359000 | -2.97957200 | 0.22887700  |
| H | -2.55675300 | -2.90908800 | -2.03824700 | C            | -5.36641100 | -2.74682500 | 0.00977700  |
| H | -4.01619800 | -2.00681400 | -2.46402200 | C            | -4.94568300 | -1.51969700 | -0.57028200 |
| C | -4.04239200 | -2.84732900 | -0.48282100 | C            | -5.93323800 | -0.57061500 | -0.90137200 |
| C | -3.32893300 | -3.53712300 | 0.50890900  | C            | -7.28607800 | -0.81808800 | -0.67350800 |
| C | -5.43473600 | -2.75852200 | -0.37794900 | H            | -3.99912000 | -3.53115400 | 1.45559000  |
| C | -3.99849900 | -4.11450500 | 1.58788000  | H            | -8.74087300 | -2.23083700 | 0.06877200  |
| H | -2.24804100 | -3.61610200 | 0.42700300  | H            | -7.02991800 | -3.92443100 | 0.67256300  |
| C | -6.10708900 | -3.33866800 | 0.70017200  | C            | -4.33036100 | -3.76461200 | 0.43363700  |
| H | -5.99896100 | -2.23228700 | -1.14512500 | C            | -3.51035700 | -1.30532500 | -0.84245100 |
| C | -5.38933200 | -4.01631600 | 1.68653300  | H            | -5.65483000 | 0.37633500  | -1.34989700 |
| H | -3.43522700 | -4.64815900 | 2.34896900  | H            | -8.02251900 | -0.06690500 | -0.94574600 |
| H | -7.18906600 | -3.26169500 | 0.76740900  | C            | -2.63203300 | -2.34917600 | -0.74595900 |
| H | -5.91019600 | -4.47023600 | 2.52540000  | C            | -3.10739400 | -3.75715900 | -0.48870300 |
| C | -1.28504400 | -0.96896000 | -1.09627900 | H            | -1.61663900 | -2.20608300 | -1.10656000 |
| O | -0.61715600 | -2.07419100 | -1.02249400 | H            | -2.30723800 | -4.36874000 | -0.06081400 |
| O | -0.61961400 | 0.12097700  | -0.92060100 | H            | -4.77684100 | -4.76455800 | 0.47475000  |
| O | 2.64188500  | 0.09701900  | -0.28846000 | H            | -3.36288200 | -4.21496400 | -1.45843400 |
| C | 4.75181100  | -1.05840000 | 0.08937800  | C            | -2.97849400 | 0.04839500  | -1.30119100 |
| C | 5.61009900  | 0.04117800  | 0.27652300  | H            | -2.19684500 | -0.10710700 | -2.04493700 |
| C | 5.29836800  | -2.35360400 | 0.19035800  | H            | -3.75644400 | 0.65361800  | -1.77195900 |
| C | 6.96354300  | -0.16300900 | 0.55628500  | N            | -2.38174300 | 0.85827300  | -0.22848900 |
| C | 6.64328900  | -2.55791000 | 0.46892400  | C            | -3.25350500 | 1.55590900  | 0.72413400  |
| C | 7.47833200  | -1.45562400 | 0.65317200  | H            | -2.63417500 | 1.81156100  | 1.58635200  |
| H | 7.61820700  | 0.68919800  | 0.69892900  | H            | -4.01977700 | 0.85190900  | 1.06563800  |
| H | 7.03637300  | -3.56745600 | 0.54161500  | C            | -3.90160300 | 2.80338700  | 0.14914900  |
| H | 8.53367700  | -1.59330900 | 0.87225200  | C            | -3.11147200 | 3.82027800  | -0.40626700 |
| H | 4.62771800  | -3.19240200 | 0.04274400  | C            | -5.28956100 | 2.97472200  | 0.19578400  |
| I | 5.01617700  | 2.10825800  | 0.15888800  | C            | -3.70046200 | 4.97905900  | -0.90971000 |

|           |             |             |             |   |            |             |             |
|-----------|-------------|-------------|-------------|---|------------|-------------|-------------|
| H         | -2.03111900 | 3.70249600  | -0.43181200 | C | 5.86601600 | -0.51133000 | 1.01256100  |
| C         | -5.88179900 | 4.13813000  | -0.30401800 | C | 7.20237400 | -0.83802000 | 1.17635000  |
| H         | -5.91106500 | 2.19331000  | 0.62720900  | H | 4.53857900 | -4.02786600 | -1.23410700 |
| C         | -5.08845900 | 5.14128400  | -0.86046400 | H | 8.68954900 | -2.40647500 | 1.05269800  |
| H         | -3.07624900 | 5.76011900  | -1.33576800 | H | 7.06124100 | -4.11930200 | 0.30474300  |
| H         | -6.96132900 | 4.25665400  | -0.26016000 | C | 4.42857500 | -3.88767900 | -0.15097800 |
| H         | -5.54615300 | 6.04581700  | -1.25200400 | C | 3.52292000 | -1.13556900 | 0.40303600  |
| C         | -1.04276000 | 0.89132900  | -0.08287200 | H | 5.55911800 | 0.51210200  | 1.19803900  |
| O         | -0.47608400 | 1.58304800  | 0.84867500  | H | 7.90504400 | -0.07658100 | 1.50405100  |
| O         | -0.25921600 | 0.22186800  | -0.86260800 | C | 2.57763100 | -2.13801100 | -0.23080100 |
| O         | 3.01718400  | 0.05991800  | -0.30153300 | C | 2.96566900 | -3.57515800 | 0.17808000  |
| C         | 5.01420400  | 0.64705800  | 0.96234400  | H | 1.55680600 | -1.93522600 | 0.11315700  |
| C         | 6.00848300  | 0.05346900  | 0.16337000  | H | 2.29893300 | -4.29808900 | -0.30151500 |
| C         | 5.40650100  | 1.24712900  | 2.17559100  | H | 4.71441900 | -4.84144500 | 0.30882400  |
| C         | 7.34261300  | 0.06239000  | 0.57745600  | H | 2.80561400 | -3.65657700 | 1.25967400  |
| C         | 6.73159200  | 1.25308200  | 2.59104100  | C | 2.89926400 | 0.09209300  | 1.02664900  |
| C         | 7.70284800  | 0.65612000  | 1.78712100  | H | 2.13869400 | -0.22004500 | 1.75019300  |
| H         | 8.10320500  | -0.39433100 | -0.04553300 | H | 3.63401900 | 0.68664500  | 1.57279200  |
| H         | 7.00406200  | 1.71971100  | 3.53284500  | N | 2.22039700 | 0.98900200  | 0.07849100  |
| H         | 8.74542400  | 0.65027300  | 2.09326000  | C | 3.04134600 | 1.81146400  | -0.81843300 |
| H         | 4.63228300  | 1.70579300  | 2.78008300  | H | 2.39386800 | 2.13004700  | -1.63785200 |
| I         | 5.66139800  | -0.88216600 | -1.74599400 | H | 3.82090800 | 1.16873900  | -1.24291000 |
| C         | 3.55845000  | 0.70044200  | 0.65735200  | C | 3.66459900 | 3.01217600  | -0.13053000 |
| O         | 2.78505800  | 1.40999200  | 1.39495500  | C | 2.85294400 | 3.96619600  | 0.50032200  |
| C         | -1.47261900 | -2.07941400 | 1.52045200  | C | 5.05104800 | 3.20066200  | -0.13627400 |
| F         | -1.62514800 | -3.22185100 | 2.20063500  | C | 3.41984100 | 5.08050300  | 1.11660600  |
| F         | -2.00600500 | -1.06980700 | 2.20923900  | H | 1.77392500 | 3.83356900  | 0.49670800  |
| F         | -0.16914500 | -1.85600600 | 1.31971300  | C | 5.62141300 | 4.31982000  | 0.47745200  |
| <b>14</b> |             |             |             | H | 5.68911100 | 2.46953000  | -0.62833900 |
| Cu        | -1.42631400 | 0.84982100  | -0.31769900 | C | 4.80663500 | 5.26046600  | 1.10712600  |
| C         | 7.64467300  | -2.14134200 | 0.91901700  | H | 2.77962500 | 5.81366800  | 1.60013700  |
| C         | 6.72422300  | -3.10192500 | 0.49324100  | H | 6.69997400 | 4.45290500  | 0.46349800  |
| C         | 5.37684800  | -2.80023600 | 0.30912200  | H | 5.24677400 | 6.13084700  | 1.58632000  |
| C         | 4.90466700  | -1.46988300 | 0.57047000  | C | 0.88117800 | 0.96023800  | -0.04883100 |

|                    |             |             |             |   |             |             |             |
|--------------------|-------------|-------------|-------------|---|-------------|-------------|-------------|
| O                  | 0.25464700  | 1.74416100  | -0.86026100 | H | 3.09293100  | -1.89642100 | 4.53570800  |
| O                  | 0.15097200  | 0.14064600  | 0.63799800  | C | 2.61618100  | -1.80805700 | -1.41736900 |
| O                  | -3.12978600 | -0.05107600 | 0.21559100  | C | 1.47482100  | -2.83813500 | -1.36825700 |
| C                  | -5.20425600 | 0.60202600  | -0.87667500 | H | 2.34046100  | -1.00789400 | -2.11129700 |
| C                  | -6.14122400 | -0.09683300 | -0.09362700 | H | 1.34451000  | -3.29594500 | -2.35293000 |
| C                  | -5.66658300 | 1.27664700  | -2.02413600 | H | 0.82321000  | -4.52453300 | -0.18139000 |
| C                  | -7.48841300 | -0.11930100 | -0.46149700 | H | 0.56087100  | -2.28448300 | -1.13410800 |
| C                  | -7.00494700 | 1.25090500  | -2.39427500 | C | 3.63510900  | 0.10445600  | -0.01689800 |
| C                  | -7.91822900 | 0.54703300  | -1.60912300 | H | 3.79946500  | 0.45589700  | 1.00483600  |
| H                  | -8.20490300 | -0.65675700 | 0.14910100  | H | 4.62596700  | -0.03729200 | -0.46745500 |
| H                  | -7.33235800 | 1.77538200  | -3.28682000 | N | 2.94188700  | 1.13460700  | -0.78797600 |
| H                  | -8.96971800 | 0.51437800  | -1.88107600 | C | 3.67661400  | 2.33877800  | -1.19534000 |
| H                  | -4.93656600 | 1.81731900  | -2.61583700 | H | 3.01265600  | 2.89143300  | -1.86369500 |
| I                  | -5.68310500 | -1.14148000 | 1.73377100  | H | 4.54784100  | 2.01447500  | -1.77597400 |
| C                  | -3.74144400 | 0.69024500  | -0.62115500 | C | 4.11758400  | 3.21125800  | -0.03203500 |
| O                  | -3.03270800 | 1.53065700  | -1.28215100 | C | 3.16563700  | 3.91137400  | 0.72627700  |
| C                  | 2.49921300  | -1.99658100 | -1.75611400 | C | 5.47082500  | 3.32768700  | 0.30505700  |
| F                  | 1.73905300  | -2.97408800 | -2.29962600 | C | 3.56453200  | 4.70421100  | 1.80156200  |
| F                  | 3.71060200  | -2.05154900 | -2.35650600 | H | 2.11397500  | 3.83698200  | 0.46220600  |
| F                  | 1.93938900  | -0.81912600 | -2.12969600 | C | 5.87207000  | 4.12570700  | 1.38005900  |
| <b>MECP(14-15)</b> |             |             |             | H | 6.21940600  | 2.79714600  | -0.28079700 |
| Cu                 | -0.82872600 | 1.29751800  | -0.61950500 | C | 4.91897000  | 4.81392300  | 2.13115900  |
| C                  | 2.26729300  | -3.57498000 | 3.45011200  | H | 2.81824400  | 5.24352700  | 2.37888800  |
| C                  | 1.91392200  | -4.06339700 | 2.19153800  | H | 6.92720000  | 4.20853200  | 1.62727100  |
| C                  | 2.10575000  | -3.31272900 | 1.03248300  | H | 5.22817500  | 5.43689600  | 2.96626800  |
| C                  | 2.67677000  | -2.00071300 | 1.12788700  | C | 1.58290700  | 1.14549900  | -0.69676000 |
| C                  | 3.01438500  | -1.52298800 | 2.42797600  | O | 0.88381100  | 2.11981200  | -1.13641000 |
| C                  | 2.82105200  | -2.29378700 | 3.56181700  | O | 0.98840100  | 0.12430400  | -0.18111700 |
| H                  | 2.51723100  | -4.58910000 | -0.63334200 | O | -2.51888400 | 0.44977200  | -0.04262500 |
| H                  | 2.10399900  | -4.18265100 | 4.33578700  | C | -4.70699900 | 1.45125400  | -0.35702100 |
| H                  | 1.47213600  | -5.05371100 | 2.10498200  | C | -5.53547700 | 0.39538000  | 0.05581400  |
| C                  | 1.72108100  | -3.90764600 | -0.30325200 | C | -5.31901300 | 2.68309400  | -0.65977200 |
| C                  | 2.86961900  | -1.19977600 | -0.04829800 | C | -6.91667600 | 0.57369100  | 0.16645300  |
| H                  | 3.43107700  | -0.53040100 | 2.55052000  | C | -6.69046000 | 2.86942100  | -0.54658100 |



|                        |             |             |             |   |             |             |             |
|------------------------|-------------|-------------|-------------|---|-------------|-------------|-------------|
| C                      | -7.49309100 | 1.80834200  | -0.12878700 | H | -4.62546900 | 1.05978800  | -0.58661700 |
| H                      | -7.54406400 | -0.25196400 | 0.48204400  | N | -3.22945500 | -0.39336700 | -1.11675200 |
| H                      | -7.12891700 | 3.83414000  | -0.78402000 | C | -4.14712600 | -1.42419400 | -1.61614800 |
| H                      | -8.56838800 | 1.93222600  | -0.03365000 | H | -3.60850300 | -1.95386400 | -2.40533300 |
| H                      | -4.67149400 | 3.48782000  | -0.98771700 | H | -5.00584400 | -0.91781300 | -2.07342300 |
| I                      | -4.84971100 | -1.60062500 | 0.51456400  | C | -4.61953500 | -2.38860600 | -0.54116100 |
| C                      | -3.21541000 | 1.41790500  | -0.50396400 | C | -3.72173100 | -3.30876500 | 0.02199200  |
| O                      | -2.63034600 | 2.38460200  | -1.07660300 | C | -5.94233500 | -2.36668800 | -0.08574300 |
| C                      | 3.89681100  | -2.39623600 | -2.02861500 | C | -4.14363200 | -4.18464100 | 1.02113600  |
| F                      | 3.63484700  | -3.02881700 | -3.19174300 | H | -2.69425400 | -3.33657300 | -0.33139000 |
| F                      | 4.51667300  | -3.28284200 | -1.21708300 | C | -6.36763700 | -3.24655200 | 0.91327700  |
| F                      | 4.80351700  | -1.42511300 | -2.31006100 | H | -6.64796400 | -1.65964200 | -0.51746700 |
| <b>MECP(14-15) iso</b> |             |             |             | C | -5.46814900 | -4.15662200 | 1.46847600  |
| Cu                     | 0.46771100  | -0.98787200 | -1.21873800 | H | -3.43926400 | -4.89352900 | 1.44857500  |
| C                      | -2.10799100 | 4.87817500  | -2.56980100 | H | -7.39896100 | -3.21867500 | 1.25556000  |
| C                      | -1.46040100 | 4.87369000  | -1.33436600 | H | -5.79534600 | -4.84189300 | 2.24582800  |
| C                      | -1.62340900 | 3.82821400  | -0.42652600 | C | -1.88722700 | -0.57808300 | -1.18819300 |
| C                      | -2.48450800 | 2.73933100  | -0.75681600 | O | -1.35728100 | -1.54569400 | -1.83056900 |
| C                      | -3.11684700 | 2.75528200  | -2.03018100 | O | -1.10566400 | 0.26168600  | -0.59160600 |
| C                      | -2.93565700 | 3.80446500  | -2.91743100 | O | 2.21193400  | -0.31059400 | -0.51140200 |
| H                      | 0.10980600  | 4.29087100  | 0.74855900  | C | 4.27121300  | -1.57587900 | -0.71461000 |
| H                      | -1.95895800 | 5.70413600  | -3.25951100 | C | 5.13984100  | -0.75082700 | 0.02044500  |
| H                      | -0.80443700 | 5.69922000  | -1.06821800 | C | 4.81251600  | -2.73302600 | -1.30833600 |
| C                      | -0.89098100 | 3.86946700  | 0.89680500  | C | 6.49392200  | -1.07304100 | 0.14270700  |
| C                      | -2.69247600 | 1.64951800  | 0.16457600  | C | 6.15743300  | -3.05957900 | -1.18885200 |
| H                      | -3.74281700 | 1.92190600  | -2.32810800 | C | 7.00321000  | -2.22198800 | -0.46131500 |
| H                      | -3.43283300 | 3.78770000  | -3.88289800 | H | 7.15186500  | -0.42747600 | 0.71296400  |
| C                      | -2.18017000 | 1.83809900  | 1.58256700  | H | 6.54198100  | -3.96079400 | -1.65742100 |
| C                      | -0.78568000 | 2.49635100  | 1.56075600  | H | 8.05942900  | -2.45644700 | -0.35605000 |
| H                      | -0.09548900 | 1.85143000  | 1.01036400  | H | 4.13115300  | -3.36535400 | -1.86607600 |
| H                      | -1.41223100 | 4.56055700  | 1.57877800  | I | 4.56066500  | 1.05230800  | 1.06097400  |
| H                      | -0.41068300 | 2.60291100  | 2.58126900  | C | 2.80582500  | -1.35721300 | -0.93583200 |
| C                      | -3.73285300 | 0.59002900  | -0.15111000 | O | 2.13505000  | -2.23602900 | -1.56337300 |
| H                      | -4.06050100 | 0.07359200  | 0.75223700  | H | -2.86415500 | 2.54383800  | 2.08831700  |

|           |             |             |             |           |             |             |             |
|-----------|-------------|-------------|-------------|-----------|-------------|-------------|-------------|
| C         | -2.21920000 | 0.61397900  | 2.50292400  | C         | 5.75594700  | 2.82713500  | -1.22383200 |
| F         | -1.60708400 | 0.89108900  | 3.67503200  | C         | 4.49620500  | 4.36785500  | 0.73060700  |
| F         | -3.49952900 | 0.27694100  | 2.81950400  | H         | 2.65182000  | 3.56883700  | -0.04537400 |
| F         | -1.63561200 | -0.48521900 | 1.99426900  | C         | 6.51832500  | 3.62291700  | -0.36445000 |
| <b>15</b> |             |             |             | H         | 6.24942900  | 2.23273900  | -1.98995900 |
| Cu        | -1.14688000 | 1.28200800  | -1.17679300 | C         | 5.88952000  | 4.39235800  | 0.61456300  |
| C         | 2.61136100  | -0.77508400 | 4.17401900  | H         | 4.00103900  | 4.97275600  | 1.48510400  |
| C         | 2.20117300  | -1.97206200 | 3.59590600  | H         | 7.60027200  | 3.64040800  | -0.46201000 |
| C         | 2.18605100  | -2.14715000 | 2.20545300  | H         | 6.48028500  | 5.01295400  | 1.28256900  |
| C         | 2.61121300  | -1.08707200 | 1.38292400  | C         | 1.59004200  | 0.63012900  | -1.19674000 |
| C         | 3.01068700  | 0.12296400  | 1.97475000  | O         | 0.71244400  | 1.42544600  | -1.57182100 |
| C         | 3.01399900  | 0.28262200  | 3.35658000  | O         | 1.30927200  | -0.51990700 | -0.57335000 |
| H         | 2.52672300  | -4.21868800 | 1.76481000  | O         | -2.97008600 | 1.14057900  | -0.88164900 |
| H         | 2.60674000  | -0.66306700 | 5.25457700  | C         | -4.75535700 | 1.39249600  | 0.67247900  |
| H         | 1.87392000  | -2.79306900 | 4.22963600  | C         | -5.64206600 | 0.38642300  | 0.26876800  |
| C         | 1.72818700  | -3.47492800 | 1.63688600  | C         | -5.26667100 | 2.41205700  | 1.49548000  |
| C         | 2.56459100  | -1.19426000 | -0.13822700 | C         | -6.98527700 | 0.40300000  | 0.65238300  |
| H         | 3.31392500  | 0.96236100  | 1.35596600  | C         | -6.60550100 | 2.45405100  | 1.86855900  |
| H         | 3.32437700  | 1.22857600  | 3.79029300  | C         | -7.47035600 | 1.44559500  | 1.44197300  |
| C         | 2.41321900  | -2.64523700 | -0.65994500 | H         | -7.65073700 | -0.39404200 | 0.33899600  |
| C         | 1.33926500  | -3.38097700 | 0.15993700  | H         | -6.97044900 | 3.26389000  | 2.49439200  |
| H         | 2.08679300  | -2.57952800 | -1.70361200 | H         | -8.51913300 | 1.45727500  | 1.72705900  |
| H         | 1.16923800  | -4.37562800 | -0.26011800 | H         | -4.56720200 | 3.16911900  | 1.83431600  |
| H         | 0.87501200  | -3.84448700 | 2.21690400  | I         | -5.03592200 | -1.34728300 | -0.88075500 |
| H         | 0.40554900  | -2.81940000 | 0.05421100  | C         | -3.28384700 | 1.50728800  | 0.32229700  |
| C         | 3.65962700  | -0.36267600 | -0.87739300 | O         | -2.50477200 | 1.97233200  | 1.16139400  |
| H         | 4.46804300  | -0.06631100 | -0.20514900 | C         | 3.74076500  | -3.41306800 | -0.69789300 |
| H         | 4.09429800  | -0.90684500 | -1.71989200 | F         | 3.54260700  | -4.74483100 | -0.74669900 |
| N         | 2.91485700  | 0.79313200  | -1.35690900 | F         | 4.52414400  | -3.15824700 | 0.37410100  |
| C         | 3.52774800  | 1.93235200  | -2.04068900 | F         | 4.47035000  | -3.09293800 | -1.79845900 |
| H         | 2.70366200  | 2.50347000  | -2.47597000 | <b>16</b> |             |             |             |
| H         | 4.14363500  | 1.54867200  | -2.86354600 | Cu        | 2.49145400  | 0.07306900  | -0.25335400 |
| C         | 4.36196800  | 2.79595200  | -1.11389000 | O         | 0.64493400  | 0.06609500  | -0.50297400 |
| C         | 3.73641500  | 3.57604800  | -0.12966000 | C         | -1.30913300 | 1.33523500  | 0.03885600  |

|                    |             |             |             |   |             |             |             |
|--------------------|-------------|-------------|-------------|---|-------------|-------------|-------------|
| C                  | -2.30625400 | 0.35171800  | -0.02895000 | C | -3.72870500 | -0.98082500 | -2.45421600 |
| C                  | -1.72282800 | 2.68005300  | 0.04361600  | H | -2.70660200 | 0.59663300  | -1.25216000 |
| C                  | -3.65765100 | 0.69804100  | -0.10543000 | H | -2.89579900 | -0.91923800 | -3.16357100 |
| C                  | -3.06287200 | 3.03761100  | -0.05000900 | H | -4.44694500 | -2.95255300 | -3.04609200 |
| C                  | -4.03537500 | 2.04048800  | -0.12838400 | H | -4.58539200 | -0.48866200 | -2.94396100 |
| H                  | -4.41468200 | -0.07717400 | -0.14449300 | C | -3.63439100 | 0.18320700  | 1.28365800  |
| H                  | -3.34699300 | 4.08623100  | -0.05506800 | H | -4.55233100 | 0.61588200  | 1.69970800  |
| H                  | -5.08895700 | 2.29802300  | -0.19789800 | H | -3.25732600 | -0.52709000 | 2.02747000  |
| H                  | -0.94701500 | 3.43353800  | 0.12743000  | N | -2.67259700 | 1.28462600  | 1.18170100  |
| I                  | -1.91721100 | -1.77437100 | 0.08653100  | C | -3.13679300 | 2.68142500  | 1.05885900  |
| C                  | 0.18519900  | 1.11565400  | 0.10532900  | H | -2.38228500 | 3.30614800  | 1.54121100  |
| O                  | 0.89639300  | 1.95032200  | 0.68444900  | H | -4.06094200 | 2.76049600  | 1.64112700  |
| C                  | 6.90805500  | -0.09423100 | 0.25448200  | C | -3.37719200 | 3.16171400  | -0.36024600 |
| H                  | 7.18363500  | -0.93453300 | 0.89947900  | C | -2.29563500 | 3.52602700  | -1.17579800 |
| H                  | 7.24272800  | 0.83789100  | 0.72062200  | C | -4.67601200 | 3.25458600  | -0.87268600 |
| H                  | 7.40657600  | -0.20854600 | -0.71320000 | C | -2.51356500 | 3.96321300  | -2.48270500 |
| C                  | 5.46387100  | -0.06324000 | 0.06953700  | H | -1.28548100 | 3.46067100  | -0.78013500 |
| N                  | 4.31657700  | -0.03601200 | -0.07454800 | C | -4.89590400 | 3.69640000  | -2.17905300 |
| <b>MECP(12-17)</b> |             |             |             | H | -5.52210600 | 2.97761600  | -0.24730400 |
| Cu                 | 0.92199800  | 0.46454400  | 1.50986400  | C | -3.81409900 | 4.04969400  | -2.98707900 |
| C                  | -6.85088200 | -3.73834500 | 0.11959600  | H | -1.66813300 | 4.24082800  | -3.10665000 |
| C                  | -5.99104200 | -3.58940600 | -0.97180100 | H | -5.90986200 | 3.76300700  | -2.56468200 |
| C                  | -5.03845800 | -2.57232600 | -1.00778300 | H | -3.98289700 | 4.39240600  | -4.00439100 |
| C                  | -4.94077700 | -1.66324900 | 0.07440600  | C | -1.35197400 | 1.03727900  | 1.29236300  |
| C                  | -5.80178000 | -1.83372700 | 1.17090100  | O | -0.46941400 | 1.96789200  | 1.24154300  |
| C                  | -6.74918200 | -2.85912400 | 1.19533800  | O | -0.91338000 | -0.17291700 | 1.46455500  |
| H                  | -3.12642200 | -2.96299800 | -1.87820600 | O | 2.39008800  | -0.61532600 | 0.31287800  |
| H                  | -7.59034700 | -4.53468500 | 0.12637800  | C | 4.57319000  | 0.43968600  | 0.18638800  |
| H                  | -6.05769700 | -4.27869600 | -1.81071200 | C | 5.13855100  | -0.22500100 | -0.91608700 |
| C                  | -4.05946100 | -2.44681000 | -2.15450800 | C | 5.40811900  | 1.25861700  | 0.97114100  |
| C                  | -3.94982400 | -0.56168500 | -0.00465500 | C | 6.49425600  | -0.07248000 | -1.21383200 |
| H                  | -5.74768200 | -1.15856700 | 2.01922200  | C | 6.76151500  | 1.39756900  | 0.68841200  |
| H                  | -7.40773600 | -2.96409200 | 2.05327000  | C | 7.30506800  | 0.72871200  | -0.40881200 |
| C                  | -3.39096500 | -0.24260900 | -1.18461800 | H | 6.91859300  | -0.57798400 | -2.07436100 |

|           |             |             |             |   |             |             |             |
|-----------|-------------|-------------|-------------|---|-------------|-------------|-------------|
| H         | 7.38639400  | 2.02383600  | 1.31814900  | N | 2.28734000  | -0.28131300 | 1.75798000  |
| H         | 8.36046800  | 0.82776100  | -0.64742400 | C | 2.15168900  | -1.54267900 | 2.51703900  |
| H         | 4.96152300  | 1.77524700  | 1.81341800  | H | 1.21138600  | -1.47473700 | 3.06824900  |
| I         | 4.02724800  | -1.46946600 | -2.27870700 | H | 2.96788000  | -1.56370300 | 3.24696900  |
| C         | 1.36488100  | -0.65014700 | 3.23960000  | C | 2.17341300  | -2.80086900 | 1.67086500  |
| F         | 0.80663800  | -1.85194600 | 3.14868400  | C | 1.04422000  | -3.16613800 | 0.92223400  |
| F         | 0.80873900  | 0.03975700  | 4.24586200  | C | 3.31077700  | -3.61426800 | 1.62761700  |
| F         | 2.67320300  | -0.77786000 | 3.45834500  | C | 1.06287800  | -4.31861000 | 0.13686800  |
| C         | 3.15013100  | 0.33969500  | 0.61890000  | H | 0.15455100  | -2.54252200 | 0.95664800  |
| O         | 2.67938700  | 1.27778200  | 1.37641000  | C | 3.32873400  | -4.77085300 | 0.84469000  |
| <b>17</b> |             |             |             | H | 4.18869100  | -3.34392100 | 2.21079300  |
| Cu        | -0.60525100 | 1.71321700  | 0.80581500  | C | 2.20504900  | -5.12342300 | 0.09620900  |
| C         | 7.85728000  | 1.65267000  | -1.22751500 | H | 0.18288400  | -4.59133500 | -0.43947200 |
| C         | 6.92781000  | 1.22311000  | -2.17871300 | H | 4.21872000  | -5.39401900 | 0.82088600  |
| C         | 5.69056100  | 0.70556900  | -1.79727400 | H | 2.21652000  | -6.02309300 | -0.51322700 |
| C         | 5.36794400  | 0.60539400  | -0.42199800 | C | 1.18731100  | 0.42529500  | 1.46143600  |
| C         | 6.30844300  | 1.04744300  | 0.52286500  | O | -0.00282300 | 0.04395400  | 1.74759600  |
| C         | 7.54247700  | 1.56613800  | 0.12704100  | O | 1.27518900  | 1.57654500  | 0.84571400  |
| H         | 3.97452400  | 1.15543600  | -2.98770200 | O | -2.16397900 | 0.46169100  | -0.81876800 |
| H         | 8.81684500  | 2.05169500  | -1.54507100 | C | -4.39912200 | 0.88054400  | -0.00391200 |
| H         | 7.16599800  | 1.29547000  | -3.23781700 | C | -5.11053000 | -0.26117100 | -0.40312600 |
| C         | 4.65087400  | 0.30239500  | -2.82036600 | C | -5.13198800 | 2.02252500  | 0.36865000  |
| C         | 4.05955900  | 0.02539000  | -0.03428900 | C | -6.50578100 | -0.25527300 | -0.43628100 |
| H         | 6.08981300  | 0.98359900  | 1.58457400  | C | -6.52184900 | 2.04022300  | 0.32142800  |
| H         | 8.25385100  | 1.89789800  | 0.87858300  | C | -7.20999400 | 0.89685800  | -0.08328400 |
| C         | 3.34106500  | -0.67672500 | -0.92665700 | H | -7.04403700 | -1.14762600 | -0.73572400 |
| C         | 3.81502700  | -0.89023700 | -2.34130100 | H | -7.06272200 | 2.93891400  | 0.60287900  |
| H         | 2.40860500  | -1.14471100 | -0.62788900 | H | -8.29586100 | 0.89072800  | -0.12176300 |
| H         | 2.95917400  | -1.04214300 | -3.00851600 | H | -4.58092600 | 2.90058400  | 0.68675400  |
| H         | 5.12580200  | 0.08486600  | -3.78384700 | I | -4.17100200 | -2.13410300 | -0.91262300 |
| H         | 4.41035400  | -1.81694700 | -2.38930900 | C | -0.69649800 | 3.47893500  | 0.01114600  |
| C         | 3.60911900  | 0.24623400  | 1.40105600  | F | 0.47737100  | 3.77477400  | -0.54740200 |
| H         | 4.31893400  | -0.21802900 | 2.09566200  | F | -0.93279300 | 4.33418800  | 1.01736600  |
| H         | 3.61644600  | 1.32046200  | 1.61766800  | F | -1.65232400 | 3.60036700  | -0.90881400 |

|              |             |             |             |           |             |             |             |
|--------------|-------------|-------------|-------------|-----------|-------------|-------------|-------------|
| C            | -2.90152500 | 0.98915900  | 0.00819000  | H         | 2.51619100  | 2.04419400  | -0.96363600 |
| O            | -2.44155800 | 1.75114700  | 0.98660000  | H         | 2.31776900  | 0.94309900  | -2.34050000 |
| <b>18-ts</b> |             |             |             | C         | 3.49091700  | 0.13385800  | -0.72385300 |
| Cu           | -2.10146300 | 1.72729000  | -0.55327500 | C         | 4.17166700  | -0.75030300 | -1.56785900 |
| N            | -1.95050500 | 3.45778600  | 0.21838600  | C         | 3.87019300  | 0.20751000  | 0.62602000  |
| C            | -1.28231100 | 4.12254700  | 0.89310200  | C         | 5.21200300  | -1.54729800 | -1.08187000 |
| C            | -0.39354000 | 4.88378700  | 1.75469300  | H         | 3.88908700  | -0.81303600 | -2.61719200 |
| H            | 0.45287400  | 4.21935000  | 1.96680100  | C         | 4.90607500  | -0.58859500 | 1.11342000  |
| H            | -0.04334200 | 5.78674900  | 1.24543100  | H         | 3.34776100  | 0.89849300  | 1.28237800  |
| H            | -0.90417200 | 5.16226800  | 2.68154900  | C         | 5.58065000  | -1.46850200 | 0.26119300  |
| C            | -1.96751100 | -4.19409700 | 1.73990700  | H         | 5.73116300  | -2.22791700 | -1.75196400 |
| C            | -2.73629600 | -3.83449800 | 0.63482200  | H         | 5.19291200  | -0.51909400 | 2.15979200  |
| C            | -2.45911000 | -2.67119600 | -0.09244600 | H         | 6.38953000  | -2.08611400 | 0.64293600  |
| C            | -1.37008200 | -1.85887600 | 0.29846900  | C         | 0.56501300  | 1.23968200  | 0.46045500  |
| C            | -0.60620700 | -2.22839800 | 1.41908100  | O         | 1.10989000  | 2.24241700  | 0.94893800  |
| C            | -0.90101200 | -3.38285400 | 2.13682900  | O         | -0.51274800 | 0.65020500  | 0.89877700  |
| H            | -2.83403900 | -2.63739300 | -2.21448200 | <b>19</b> |             |             |             |
| H            | -2.20534800 | -5.09739900 | 2.29578800  | Cu        | -2.82881000 | 0.27538100  | -0.54413300 |
| H            | -3.57286200 | -4.45955200 | 0.33067500  | N         | -3.85709300 | 1.80337300  | -0.10820300 |
| C            | -3.30088100 | -2.27397300 | -1.28528900 | C         | -4.36656000 | 2.75043100  | 0.31861800  |
| C            | -1.00440600 | -0.69517900 | -0.56014400 | C         | -4.99241600 | 3.94302100  | 0.87346300  |
| H            | 0.20008300  | -1.57943400 | 1.74099300  | H         | -4.38446200 | 4.32416500  | 1.70025900  |
| H            | -0.30543600 | -3.64598100 | 3.00660700  | H         | -5.07558000 | 4.71730500  | 0.10445100  |
| C            | -2.02648700 | -0.09754600 | -1.36626600 | H         | -5.99244900 | 3.70240200  | 1.24751800  |
| C            | -3.42088500 | -0.74668700 | -1.33504400 | C         | 1.98304000  | -4.66291700 | 0.64767800  |
| H            | -1.67858700 | 0.15774700  | -2.37329000 | C         | 0.69136300  | -4.76988000 | 0.14172900  |
| H            | -3.98457300 | -0.42742400 | -2.21847600 | C         | -0.08602500 | -3.63425300 | -0.13383200 |
| H            | -4.28709500 | -2.75023500 | -1.22146800 | C         | 0.46337900  | -2.36033800 | 0.09720400  |
| H            | -4.00376700 | -0.42564800 | -0.46138600 | C         | 1.75954300  | -2.26440800 | 0.63086000  |
| C            | 0.45540700  | -0.63594100 | -1.03331000 | C         | 2.51939800  | -3.39788600 | 0.90186500  |
| H            | 1.02651700  | -1.45692000 | -0.57821200 | H         | -1.48046600 | -3.91993400 | -1.74627900 |
| H            | 0.48079500  | -0.78817500 | -2.12068700 | H         | 2.56338100  | -5.55826500 | 0.85602600  |
| N            | 1.03881700  | 0.65450100  | -0.71995800 | H         | 0.26112200  | -5.75337500 | -0.03696900 |
| C            | 2.35374300  | 1.00056600  | -1.24480600 | C         | -1.49965700 | -3.79731100 | -0.65121700 |

|           |             |             |             |                    |             |             |             |
|-----------|-------------|-------------|-------------|--------------------|-------------|-------------|-------------|
| C         | -0.32249400 | -1.07936900 | -0.19589800 | C                  | 6.31839200  | -1.06212200 | -0.00030900 |
| H         | 2.17754700  | -1.28469900 | 0.84784100  | C                  | 7.60072900  | -1.74967600 | -0.00109600 |
| H         | 3.52042200  | -3.29586700 | 1.31262900  | H                  | 8.40152000  | -1.03894500 | -0.22926500 |
| C         | -1.71208700 | -1.28612800 | -0.81771200 | H                  | 7.78372100  | -2.19346800 | 0.98278400  |
| C         | -2.36882000 | -2.58112400 | -0.30686200 | H                  | 7.59628400  | -2.54102000 | -0.75751800 |
| H         | -1.54904200 | -1.41602700 | -1.90108500 | O                  | 0.81800800  | -0.46320800 | 0.00020000  |
| H         | -3.36425500 | -2.70552900 | -0.75066100 | C                  | -0.23281700 | 1.65967700  | 0.00002600  |
| H         | -1.92891900 | -4.72464600 | -0.24810100 | C                  | -1.51834100 | 1.12882500  | -0.00014100 |
| H         | -2.51333500 | -2.53526500 | 0.78140100  | C                  | -0.12503200 | 3.05918300  | -0.00007100 |
| C         | 0.50488900  | -0.04182600 | -1.01711000 | C                  | -2.67868300 | 1.88125400  | -0.00041000 |
| H         | 1.55234800  | -0.34110000 | -1.14705000 | C                  | -1.26491100 | 3.85923500  | -0.00033200 |
| H         | 0.06399400  | 0.10943900  | -2.00928600 | C                  | -2.53183400 | 3.27508800  | -0.00050500 |
| N         | 0.39123200  | 1.15793100  | -0.21196800 | H                  | -3.66773900 | 1.44490800  | -0.00055100 |
| C         | 1.06066100  | 2.40922300  | -0.52657700 | H                  | -1.16598900 | 4.93988700  | -0.00040700 |
| H         | 0.64935600  | 3.14955000  | 0.16623200  | H                  | -3.42420400 | 3.89355300  | -0.00071900 |
| H         | 0.78617600  | 2.70713700  | -1.54644100 | H                  | 0.86951400  | 3.49120700  | 0.00005900  |
| C         | 2.57417000  | 2.34543700  | -0.39383600 | I                  | -1.58676900 | -1.07560100 | 0.00004100  |
| C         | 3.40396900  | 2.43377400  | -1.51615700 | C                  | -3.86873100 | -1.23510800 | -0.00002900 |
| C         | 3.15853000  | 2.18222600  | 0.87200900  | F                  | -4.11295400 | -2.53734600 | 0.00016500  |
| C         | 4.79360100  | 2.36103600  | -1.38425600 | F                  | -4.37934400 | -0.66915500 | -1.08518000 |
| H         | 2.96059100  | 2.56244500  | -2.50172500 | F                  | -4.37942900 | -0.66881000 | 1.08489900  |
| C         | 4.54445700  | 2.10679700  | 1.00518800  | C                  | 0.98286800  | 0.78420000  | 0.00024700  |
| H         | 2.51700800  | 2.12076200  | 1.74766400  | O                  | 2.11553000  | 1.36683200  | 0.00045600  |
| C         | 5.36605200  | 2.19605100  | -0.12302000 | <b>MECP(20-16)</b> |             |             |             |
| H         | 5.42528400  | 2.43077300  | -2.26609300 | Cu                 | 3.58943100  | 0.47224800  | 0.03732800  |
| H         | 4.98569800  | 1.98368500  | 1.99090900  | O                  | 1.40517400  | -0.05579800 | 0.01110600  |
| H         | 6.44621800  | 2.13889500  | -0.01712700 | C                  | -0.04896800 | 1.87210900  | 0.00464200  |
| C         | -0.10480300 | 0.89928000  | 1.04306500  | C                  | -1.25276800 | 1.15448800  | -0.02791900 |
| O         | -0.21715100 | 1.69572600  | 1.95877600  | C                  | -0.10458000 | 3.27694400  | 0.01055500  |
| O         | -0.47600900 | -0.40048100 | 1.12194000  | C                  | -2.48366200 | 1.79589500  | -0.05771400 |
| <b>20</b> |             |             |             | C                  | -1.32903100 | 3.93483500  | -0.01697300 |
| Cu        | 3.68611300  | 0.36789600  | 0.00046600  | C                  | -2.51308400 | 3.19533700  | -0.05192600 |
| N         | 5.29939900  | -0.51611600 | 0.00020800  | H                  | -3.41005100 | 1.23590800  | -0.08964600 |
|           |             |             |             | H                  | -1.36075600 | 5.01913900  | -0.01311800 |

|              |             |             |             |   |              |             |             |
|--------------|-------------|-------------|-------------|---|--------------|-------------|-------------|
| H            | -3.47418600 | 3.70089300  | -0.07588700 | H | -2.53987200  | -4.69401800 | -2.81322100 |
| H            | 0.82918100  | 3.82920600  | 0.03577900  | C | -2.34953200  | -1.46511700 | 2.03400400  |
| I            | -1.20928800 | -0.99987200 | -0.03096100 | C | -1.48665000  | -2.40958200 | 2.83194200  |
| C            | -4.42247300 | -1.45489600 | 0.04492600  | H | -2.62851200  | -0.51146400 | 2.47589900  |
| F            | -4.65521200 | -2.75001200 | 0.00402900  | H | -1.65645800  | -2.23608600 | 3.90043400  |
| F            | -4.86513700 | -0.82940600 | -1.03452700 | H | -0.41836700  | -2.19524400 | 2.67133300  |
| F            | -4.88014200 | -0.89403900 | 1.15047600  | C | -3.92738300  | -0.90897400 | 0.14969700  |
| C            | 1.26596100  | 1.21660900  | 0.02377300  | H | -3.53755800  | -0.55142700 | -0.80741300 |
| O            | 2.34767700  | 1.90471000  | 0.04933900  | H | -4.80571800  | -1.52408600 | -0.08818300 |
| C            | 6.86371400  | -2.58567700 | -0.04676000 | N | -4.36302900  | 0.23619900  | 0.92473000  |
| H            | 7.59742000  | -2.33174900 | -0.81886200 | C | -5.54569100  | 0.07360600  | 1.78714000  |
| H            | 6.42172700  | -3.56120700 | -0.27422300 | H | -5.58619900  | 0.96277200  | 2.41827100  |
| H            | 7.36344600  | -2.63269700 | 0.92651500  | H | -5.37707900  | -0.79638800 | 2.43357700  |
| C            | 5.81731300  | -1.57677000 | -0.01285900 | C | -6.84261200  | -0.09935500 | 1.01811800  |
| N            | 4.97986500  | -0.78069900 | 0.01229200  | C | -7.37399900  | 0.97150100  | 0.28206500  |
| <b>21-ts</b> |             |             |             | C | -7.52476600  | -1.32140100 | 1.02456200  |
| Cu           | -2.69396300 | 3.46201000  | -0.32966400 | C | -8.56024300  | 0.81502600  | -0.43294700 |
| N            | -2.39198700 | 5.24742500  | -0.65660800 | H | -6.85379500  | 1.92570600  | 0.28586200  |
| C            | -2.28057300 | 6.38503900  | -0.83449700 | C | -8.71530300  | -1.47915800 | 0.30889500  |
| C            | -2.14573900 | 7.81761000  | -1.05781000 | H | -7.13008100  | -2.15416900 | 1.60391200  |
| H            | -2.67628200 | 8.36681000  | -0.27345500 | C | -9.23361400  | -0.41094400 | -0.42260900 |
| H            | -1.08870100 | 8.10130100  | -1.04127300 | H | -8.96670200  | 1.65250400  | -0.99382800 |
| H            | -2.57195200 | 8.08364400  | -2.03036300 | H | -9.23553400  | -2.43300000 | 0.32693600  |
| C            | -1.74917500 | -5.50911200 | -0.97749400 | H | -10.16022400 | -0.52853200 | -0.97768500 |
| C            | -1.53738700 | -5.28959900 | 0.38620600  | C | -3.88873600  | 1.50581000  | 0.65137700  |
| C            | -1.92533500 | -4.09335300 | 0.98920300  | O | -4.40228400  | 2.51939600  | 1.16573300  |
| C            | -2.53717100 | -3.08599000 | 0.20113200  | O | -2.86332700  | 1.57233300  | -0.16510700 |
| C            | -2.75410600 | -3.32306000 | -1.16858600 | O | 6.26350500   | -1.11589800 | 0.08028700  |
| C            | -2.36255300 | -4.52524800 | -1.75515600 | C | 4.26473700   | -1.42510100 | -1.14055200 |
| H            | -1.44324500 | -6.44915400 | -1.42766800 | C | 2.96376200   | -1.06715900 | -1.50621400 |
| H            | -1.07318300 | -6.06408400 | 0.99173900  | C | 4.67500800   | -2.73122700 | -1.46359700 |
| C            | -1.78877000 | -3.87468300 | 2.48053900  | C | 2.10845600   | -1.93845300 | -2.17940400 |
| C            | -2.90385000 | -1.80510700 | 0.83861900  | C | 3.83945200   | -3.62006000 | -2.13423400 |
| H            | -3.23039700 | -2.56615900 | -1.78407100 | C | 2.55332700   | -3.22306600 | -2.49785000 |

|           |             |             |             |   |             |             |             |
|-----------|-------------|-------------|-------------|---|-------------|-------------|-------------|
| H         | 1.11201900  | -1.62533400 | -2.47239500 | H | -0.99571800 | -2.45070000 | 4.54239000  |
| H         | 4.19458500  | -4.61702500 | -2.37728200 | H | -3.22671000 | -2.23927200 | 3.51633800  |
| H         | 1.89170800  | -3.90067500 | -3.02971400 | C | -3.87938800 | -1.35241900 | 1.05991600  |
| H         | 5.67853800  | -3.02179000 | -1.17547400 | C | -1.42795900 | -0.54315000 | -0.37858700 |
| I         | 2.10908000  | 0.87578000  | -1.02389000 | H | 0.86175500  | -0.91468400 | 1.00027600  |
| C         | -0.43216000 | -0.37008600 | 0.22764200  | H | 1.05395100  | -1.80188400 | 3.28824500  |
| F         | -1.03889700 | -0.35767800 | -0.88436100 | C | -2.75705700 | -0.58689000 | -1.09391700 |
| F         | 0.23847800  | -1.40564500 | 0.54565100  | C | -3.94681500 | -0.40454100 | -0.13733300 |
| F         | -0.49548800 | 0.61360000  | 1.02549600  | H | -4.87937300 | -0.54442400 | -0.69070900 |
| C         | 5.26711500  | -0.49688100 | -0.48054200 | H | -3.92939300 | 0.63343200  | 0.20905100  |
| O         | 5.11726000  | 0.72543500  | -0.52299900 | C | -0.23768200 | -0.07482200 | -1.19584700 |
| H         | -1.02234000 | -4.53564600 | 2.89820500  | H | 0.45774200  | -0.91881300 | -1.29263100 |
| H         | -2.73751700 | -4.15902800 | 2.95948600  | H | -0.58675200 | 0.17574500  | -2.20413900 |
| Cu        | 7.53725400  | 0.03687300  | 0.77667300  | N | 0.50890900  | 1.04015000  | -0.63678800 |
| N         | 8.88547600  | 1.06924100  | 1.48174600  | C | -0.02200800 | 2.37773700  | -0.92069500 |
| C         | 9.73996100  | 1.72273400  | 1.90580000  | H | -0.13791600 | 2.51007300  | -2.00745000 |
| C         | 10.81675800 | 2.54576300  | 2.43743700  | H | 0.75171400  | 3.07497200  | -0.59019100 |
| H         | 11.39633200 | 1.97334300  | 3.16859200  | C | -1.33753000 | 2.67218600  | -0.23135700 |
| H         | 11.47844700 | 2.86151600  | 1.62458200  | C | -2.43659000 | 3.14125600  | -0.96587500 |
| H         | 10.40076100 | 3.43289100  | 2.92534500  | C | -1.45893500 | 2.55780300  | 1.16414300  |
| <b>22</b> |             |             |             | C | -3.62733900 | 3.49385300  | -0.32573300 |
| Cu        | 4.19838400  | -0.23623700 | -0.23034800 | H | -2.35023400 | 3.25638800  | -2.04430900 |
| N         | 6.03248000  | -0.26910300 | -0.09180900 | C | -2.64649900 | 2.90733400  | 1.80610500  |
| C         | 7.18613900  | -0.23996100 | -0.01976200 | H | -0.60810800 | 2.21029000  | 1.74428400  |
| C         | 8.63847000  | -0.19967800 | 0.07018000  | C | -3.73460000 | 3.37815800  | 1.06315300  |
| H         | 8.96068900  | 0.78842500  | 0.41390700  | H | -4.46439200 | 3.86847000  | -0.90808000 |
| H         | 8.98929900  | -0.95772100 | 0.77761700  | H | -2.71946700 | 2.83141200  | 2.88763400  |
| H         | 9.07684800  | -0.39714700 | -0.91323900 | H | -4.65506600 | 3.66381500  | 1.56442200  |
| C         | -1.08213700 | -2.05823000 | 3.53268000  | C | 1.89587200  | 0.91267400  | -0.42850100 |
| C         | -2.34820000 | -1.93818500 | 2.95299100  | O | 2.60192500  | 1.90770000  | -0.25100400 |
| C         | -2.50318100 | -1.43692200 | 1.66587300  | O | 2.32691400  | -0.32618900 | -0.40033800 |
| C         | -1.32299000 | -1.03162000 | 0.93506900  | C | -2.85570800 | -1.88498400 | -1.92596700 |
| C         | -0.03393500 | -1.17325000 | 1.55598700  | F | -2.77307500 | -2.98860200 | -1.15322400 |
| C         | 0.07736400  | -1.68449000 | 2.83035000  | F | -1.85792300 | -1.95215400 | -2.83091900 |



|              |             |             |             |                    |             |             |             |
|--------------|-------------|-------------|-------------|--------------------|-------------|-------------|-------------|
| F            | -4.02065600 | -1.92383200 | -2.58576500 | C                  | -3.10433000 | 2.41181300  | 0.50150000  |
| H            | -4.59759600 | -1.04460100 | 1.82752100  | C                  | -3.92915700 | 3.59003900  | 0.71178200  |
| H            | -4.17325000 | -2.36750900 | 0.76029700  | H                  | -3.47512700 | 4.44674100  | 0.20291000  |
| H            | -2.77243900 | 0.21534800  | -1.83830100 | H                  | -4.93122800 | 3.41555900  | 0.30665200  |
| <b>23-ts</b> |             |             |             | H                  | -4.00403300 | 3.80183100  | 1.78335100  |
| Cu           | -1.15295800 | 0.68284200  | -0.09957700 | O                  | -0.03557000 | 1.43642100  | -0.87386200 |
| N            | -3.03367200 | 1.06525500  | 0.15219000  | C                  | 2.29081400  | 1.17540500  | -0.13032700 |
| C            | -4.07309800 | 1.56363500  | 0.24760100  | C                  | 2.32472100  | -0.16887700 | 0.22673300  |
| C            | -5.37804600 | 2.19515600  | 0.36714400  | C                  | 3.42017500  | 1.93387700  | 0.22610300  |
| H            | -5.28212400 | 3.26882900  | 0.17435200  | C                  | 3.37215900  | -0.77652000 | 0.90852900  |
| H            | -6.07106500 | 1.75934800  | -0.35967900 | C                  | 4.49833100  | 1.36538500  | 0.90224000  |
| H            | -5.77210100 | 2.04539400  | 1.37748400  | C                  | 4.47608500  | 0.01449000  | 1.24635500  |
| O            | 0.05022900  | 2.10847300  | -0.23131800 | H                  | 3.34805100  | -1.82616300 | 1.18148600  |
| C            | 2.30846700  | 1.22630900  | 0.17825100  | H                  | 5.35373300  | 1.98019700  | 1.16307900  |
| C            | 2.20227800  | -0.15608900 | 0.04529100  | H                  | 5.30577000  | -0.43690500 | 1.78150000  |
| C            | 3.52334600  | 1.66765500  | 0.73571400  | H                  | 3.41833000  | 2.98334800  | -0.04963800 |
| C            | 3.16874100  | -1.08350100 | 0.43580200  | I                  | 0.72938800  | -1.53739500 | -0.37422800 |
| C            | 4.52013800  | 0.78311900  | 1.14708100  | C                  | -2.51307200 | -1.29884600 | 0.27800000  |
| C            | 4.34774500  | -0.59359400 | 0.99968700  | F                  | -2.19143500 | -2.53062300 | -0.12704300 |
| H            | 3.02239400  | -2.15035100 | 0.30914000  | F                  | -3.64183100 | -0.93494700 | -0.32601800 |
| H            | 5.43476000  | 1.17368100  | 1.58212600  | F                  | -2.66211900 | -1.28253100 | 1.59999300  |
| H            | 5.11684800  | -1.29139700 | 1.31571900  | C                  | 1.19404900  | 1.91087000  | -0.86084700 |
| H            | 3.65386100  | 2.74064200  | 0.82386700  | O                  | 1.44197600  | 2.96346900  | -1.42283300 |
| I            | 0.49564600  | -1.09700000 | -0.97530900 | <b>MECP(24-25)</b> |             |             |             |
| C            | -1.59153500 | -1.93284000 | 0.73470500  | Cu                 | 0.92199800  | 0.46454400  | 1.50986400  |
| F            | -2.72898000 | -1.99764700 | 0.09650900  | C                  | -6.85088200 | -3.73834500 | 0.11959600  |
| F            | -1.63504900 | -1.24424900 | 1.84875800  | C                  | -5.99104200 | -3.58940600 | -0.97180100 |
| F            | -1.04880400 | -3.10626300 | 0.89959300  | C                  | -5.03845800 | -2.57232600 | -1.00778300 |
| C            | 1.33196900  | 2.34172100  | -0.21277000 | C                  | -4.94077700 | -1.66324900 | 0.07440600  |
| O            | 1.80666100  | 3.44148700  | -0.44168400 | C                  | -5.80178000 | -1.83372700 | 1.17090100  |
| <b>24</b>    |             |             |             | C                  | -6.74918200 | -2.85912400 | 1.19533800  |
| Cu           | -1.15519900 | 0.11607400  | -0.16793600 | H                  | -3.12642200 | -2.96299800 | -1.87820600 |
| N            | -2.44910400 | 1.47701800  | 0.33223400  | H                  | -7.59034700 | -4.53468500 | 0.12637800  |
|              |             |             |             | H                  | -6.05769700 | -4.27869600 | -1.81071200 |

|   |             |             |             |           |             |             |             |
|---|-------------|-------------|-------------|-----------|-------------|-------------|-------------|
| C | -4.05946100 | -2.44681000 | -2.15450800 | C         | 5.40811900  | 1.25861700  | 0.97114100  |
| C | -3.94982400 | -0.56168500 | -0.00465500 | C         | 6.49425600  | -0.07248000 | -1.21383200 |
| H | -5.74768200 | -1.15856700 | 2.01922200  | C         | 6.76151500  | 1.39756900  | 0.68841200  |
| H | -7.40773600 | -2.96409200 | 2.05327000  | C         | 7.30506800  | 0.72871200  | -0.40881200 |
| C | -3.39096500 | -0.24260900 | -1.18461800 | H         | 6.91859300  | -0.57798400 | -2.07436100 |
| C | -3.72870500 | -0.98082500 | -2.45421600 | H         | 7.38639400  | 2.02383600  | 1.31814900  |
| H | -2.70660200 | 0.59663300  | -1.25216000 | H         | 8.36046800  | 0.82776100  | -0.64742400 |
| H | -2.89579900 | -0.91923800 | -3.16357100 | H         | 4.96152300  | 1.77524700  | 1.81341800  |
| H | -4.44694500 | -2.95255300 | -3.04609200 | I         | 4.02724800  | -1.46946600 | -2.27870700 |
| H | -4.58539200 | -0.48866200 | -2.94396100 | C         | 1.36488100  | -0.65014700 | 3.23960000  |
| C | -3.63439100 | 0.18320700  | 1.28365800  | F         | 0.80663800  | -1.85194600 | 3.14868400  |
| H | -4.55233100 | 0.61588200  | 1.69970800  | F         | 0.80873900  | 0.03975700  | 4.24586200  |
| H | -3.25732600 | -0.52709000 | 2.02747000  | F         | 2.67320300  | -0.77786000 | 3.45834500  |
| N | -2.67259700 | 1.28462600  | 1.18170100  | C         | 3.15013100  | 0.33969500  | 0.61890000  |
| C | -3.13679300 | 2.68142500  | 1.05885900  | O         | 2.67938700  | 1.27778200  | 1.37641000  |
| H | -2.38228500 | 3.30614800  | 1.54121100  | <b>25</b> |             |             |             |
| H | -4.06094200 | 2.76049600  | 1.64112700  | Cu        | -2.28809400 | 0.52027700  | -0.27791000 |
| C | -3.37719200 | 3.16171400  | -0.36024600 | N         | -3.96683600 | 0.06720900  | -1.12069000 |
| C | -2.29563500 | 3.52602700  | -1.17579800 | C         | -5.00745700 | -0.21459200 | -1.53732300 |
| C | -4.67601200 | 3.25458600  | -0.87268600 | C         | -6.31723100 | -0.56898000 | -2.06021300 |
| C | -2.51356500 | 3.96321300  | -2.48270500 | H         | -6.26759800 | -0.66826600 | -3.14931100 |
| H | -1.28548100 | 3.46067100  | -0.78013500 | H         | -6.64195700 | -1.51955300 | -1.62464800 |
| C | -4.89590400 | 3.69640000  | -2.17905300 | H         | -7.03988500 | 0.21163300  | -1.80109300 |
| H | -5.52210600 | 2.97761600  | -0.24730400 | O         | 0.31497800  | -0.64364300 | -0.21419000 |
| C | -3.81409900 | 4.04969400  | -2.98707900 | C         | 1.81153500  | 1.22753200  | -0.24212300 |
| H | -1.66813300 | 4.24082800  | -3.10665000 | C         | 2.95686400  | 0.42752500  | -0.18688000 |
| H | -5.90986200 | 3.76300700  | -2.56468200 | C         | 1.97239600  | 2.62160700  | -0.26552300 |
| H | -3.98289700 | 4.39240600  | -4.00439100 | C         | 4.23727700  | 0.95646100  | -0.15406600 |
| C | -1.35197400 | 1.03727900  | 1.29236300  | C         | 3.24761200  | 3.17829700  | -0.23244700 |
| O | -0.46941400 | 1.96789200  | 1.24154300  | C         | 4.37170500  | 2.35057200  | -0.17757000 |
| O | -0.91338000 | -0.17291700 | 1.46455500  | H         | 5.11564300  | 0.32211700  | -0.11029700 |
| O | 2.39008800  | -0.61532600 | 0.31287800  | H         | 3.36696500  | 4.25658100  | -0.24798800 |
| C | 4.57319000  | 0.43968600  | 0.18638800  | H         | 5.36728100  | 2.78314600  | -0.15110500 |
| C | 5.13855100  | -0.22500100 | -0.91608700 | H         | 1.08551100  | 3.24542000  | -0.30576600 |

|           |             |             |             |              |             |             |             |
|-----------|-------------|-------------|-------------|--------------|-------------|-------------|-------------|
| I         | 2.65955300  | -1.70452100 | -0.15182400 | C            | -2.36188200 | 1.07079400  | -0.75900800 |
| C         | -2.54855000 | 0.00031700  | 1.66551800  | C            | -3.39384400 | 0.76164100  | 0.13903400  |
| F         | -2.87168300 | -1.30277600 | 1.73459200  | C            | -2.01588100 | 2.41345400  | -0.94876600 |
| F         | -3.56230400 | 0.72541100  | 2.17090500  | C            | -4.06440300 | 1.77454300  | 0.82394600  |
| F         | -1.45003300 | 0.21546100  | 2.40313900  | H            | -3.66114800 | -0.27798800 | 0.30154000  |
| C         | 0.46488200  | 0.62607700  | -0.27439000 | C            | -2.68848300 | 3.43077200  | -0.26671100 |
| O         | -0.56469300 | 1.36592700  | -0.36662700 | H            | -1.21107400 | 2.66513200  | -1.63633800 |
| <b>26</b> |             |             |             | C            | -3.71560900 | 3.11327000  | 0.62217700  |
| C         | 4.49147800  | 0.92531200  | 1.95999000  | H            | -4.86306100 | 1.51935000  | 1.51602000  |
| C         | 4.60626300  | 0.86521100  | 0.56856100  | H            | -2.40456600 | 4.46786900  | -0.42616400 |
| C         | 3.56886700  | 0.36740500  | -0.21928000 | H            | -4.23967700 | 3.90142200  | 1.15659600  |
| C         | 2.37738000  | -0.08758500 | 0.39559100  | C            | -2.79246400 | -3.33253500 | 0.75034900  |
| C         | 2.27416500  | -0.01750600 | 1.79459900  | O            | -3.83142300 | -2.81199400 | 0.88140600  |
| C         | 3.31993300  | 0.48281200  | 2.57179700  | O            | -1.77441200 | -3.89919400 | 0.63855700  |
| H         | 3.18975200  | 1.26970000  | -2.12073400 | H            | -1.00585100 | -1.94997900 | -1.25673900 |
| H         | 5.31167200  | 1.31390800  | 2.55772600  | <b>27-ts</b> |             |             |             |
| H         | 5.51726400  | 1.21302900  | 0.08573900  | C            | -5.58038600 | -2.72698000 | -0.54974400 |
| C         | 3.65948800  | 0.35295100  | -1.73010900 | C            | -5.92656600 | -1.42501100 | -0.17886100 |
| C         | 1.28908600  | -0.63692800 | -0.45046500 | C            | -4.97235800 | -0.54604500 | 0.33189100  |
| H         | 1.37436000  | -0.36671700 | 2.29087100  | C            | -3.62879200 | -0.97448700 | 0.47661100  |
| H         | 3.21675700  | 0.52244300  | 3.65290800  | C            | -3.29340900 | -2.28696200 | 0.10601900  |
| C         | 1.55800900  | -1.00094800 | -1.71757600 | C            | -4.26196000 | -3.15373700 | -0.40390900 |
| C         | 2.93019500  | -0.85677300 | -2.32708800 | H            | -5.09284600 | 1.54632100  | -0.12897300 |
| H         | 0.77955600  | -1.44930700 | -2.33134200 | H            | -6.33731900 | -3.39910100 | -0.94599000 |
| H         | 2.85748900  | -0.75190500 | -3.41606300 | H            | -6.95505200 | -1.08584600 | -0.28608800 |
| H         | 4.70710000  | 0.37567100  | -2.05163700 | C            | -5.33531200 | 0.87395900  | 0.70978800  |
| H         | 3.51293700  | -1.77522800 | -2.14579000 | C            | -2.63820300 | -0.03310500 | 1.06101700  |
| C         | -0.08334400 | -0.83754400 | 0.19108200  | H            | -2.27257000 | -2.63945200 | 0.21031000  |
| H         | -0.01222900 | -1.65397300 | 0.92335400  | H            | -3.97691000 | -4.16323400 | -0.68752300 |
| H         | -0.34649800 | 0.05919800  | 0.76463400  | C            | -3.08159200 | 1.03520300  | 1.75702300  |
| N         | -1.21655400 | -1.13655600 | -0.68380800 | C            | -4.54753600 | 1.33278600  | 1.94232200  |
| C         | -1.65550400 | -0.02378500 | -1.53999800 | H            | -2.36179400 | 1.69565300  | 2.23848600  |
| H         | -2.35198500 | -0.45112500 | -2.27411300 | H            | -4.70289100 | 2.40412400  | 2.11779100  |
| H         | -0.82894100 | 0.42652800  | -2.11227500 | H            | -6.41467700 | 0.96125100  | 0.87956000  |

|   |             |             |             |           |             |             |             |
|---|-------------|-------------|-------------|-----------|-------------|-------------|-------------|
| H | -4.92164300 | 0.81542000  | 2.84161600  | C         | 4.26158500  | 1.01933800  | 1.88716200  |
| C | -1.14191800 | -0.28520500 | 0.98731500  | H         | 4.89401500  | 0.74430500  | 2.73723800  |
| H | -0.66154900 | 0.45882500  | 1.63258200  | H         | 4.77524200  | 1.83034500  | 1.35022700  |
| H | -0.88522900 | -1.27245700 | 1.38035000  | C         | 2.89638800  | 1.48337900  | 2.37496500  |
| N | -0.47933200 | -0.24631700 | -0.35497700 | H         | 2.48162800  | 0.74659300  | 3.07318500  |
| C | -1.04564700 | 0.71417500  | -1.34537500 | H         | 3.00024200  | 2.43216500  | 2.91209100  |
| H | -2.12405000 | 0.80075800  | -1.18620000 | N         | 1.96199800  | 0.40394000  | 0.37278900  |
| H | -0.88037600 | 0.24142800  | -2.31455300 | C         | 1.97895900  | 1.63094500  | 1.17047100  |
| C | -0.41114800 | 2.09158300  | -1.33161300 | H         | 0.95415900  | 1.85546300  | 1.47241200  |
| C | -0.95417600 | 3.14410700  | -0.58110800 | H         | 2.30164900  | 2.46552800  | 0.53428600  |
| C | 0.73147400  | 2.34611800  | -2.10549400 | H         | 2.10918200  | -1.27755300 | -1.37679300 |
| C | -0.36567100 | 4.41127400  | -0.58985600 | H         | 4.67471200  | -1.13922500 | -1.78561700 |
| H | -1.85199400 | 2.96714000  | 0.00595000  | H         | 4.60831800  | -3.96178200 | -0.61476600 |
| C | 1.32378600  | 3.60997900  | -2.11724800 | H         | 4.41872000  | -2.76322000 | 1.44143800  |
| H | 1.14952400  | 1.54248400  | -2.70715000 | H         | 6.01349100  | -0.55240600 | 0.06346900  |
| C | 0.77791800  | 4.64757400  | -1.35574700 | H         | 0.81632900  | 0.07974300  | -0.06339300 |
| H | -0.80589000 | 5.21617700  | -0.00621000 |           |             |             |             |
| H | 2.20319600  | 3.78974800  | -2.73103400 | <b>28</b> |             |             |             |
| H | 1.23265000  | 5.63485700  | -1.37014700 | C         | -4.53454000 | -1.89020700 | 1.09080100  |
| C | -0.19740900 | -1.68823600 | -0.97707700 | C         | -4.57539000 | -1.18215600 | -0.11448600 |
| O | -0.00743600 | -1.65666300 | -2.19568500 | C         | -3.52429300 | -0.34931900 | -0.49707900 |
| O | -0.10083100 | -2.56915200 | -0.11179600 | C         | -2.39148400 | -0.21058500 | 0.34317300  |
| C | 5.03669500  | -2.95245100 | -0.64175700 | C         | -2.36409700 | -0.92870900 | 1.55071500  |
| C | 4.11622100  | -2.01735700 | -1.43440100 | C         | -3.42281700 | -1.75969300 | 1.92235400  |
| C | 2.87223900  | -1.56550800 | -0.65333400 | H         | -2.96836500 | -0.21246400 | -2.55733800 |
| C | 5.25077100  | -2.45810800 | 0.79592900  | H         | -5.36467700 | -2.53310600 | 1.37509100  |
| C | 3.01415800  | -0.38209400 | 0.29152300  | H         | -5.43984900 | -1.27886900 | -0.77006800 |
| C | 5.40842800  | -0.93587100 | 0.89773200  | C         | -3.52970100 | 0.38521300  | -1.82054600 |
| H | 6.00319400  | -3.03688000 | -1.15564600 | C         | -1.29212200 | 0.69918100  | -0.05500200 |
| H | 3.76778200  | -2.52730300 | -2.33889100 | H         | -1.51005500 | -0.82370200 | 2.21169100  |
| H | 2.42827500  | -2.40421400 | -0.10236800 | H         | -3.37743400 | -2.30056100 | 2.86502900  |
| H | 6.15071600  | -2.92108600 | 1.21875100  | C         | -1.52099600 | 1.62651300  | -1.00310100 |
| H | 5.96521400  | -0.70524800 | 1.80984500  | C         | -2.85054600 | 1.75614500  | -1.70303500 |
| N | 4.15211200  | -0.16167800 | 1.01020700  | H         | -0.72291000 | 2.32927400  | -1.22906200 |

|           |             |             |             |   |             |             |             |
|-----------|-------------|-------------|-------------|---|-------------|-------------|-------------|
| H         | -2.72189000 | 2.19424400  | -2.70134500 | H | -9.73026700 | -1.38462300 | -1.37396300 |
| H         | -4.55426600 | 0.47834900  | -2.20363200 | H | -8.90966800 | -1.94319300 | 0.90374500  |
| H         | -3.50483600 | 2.45060100  | -1.14770500 | C | -6.53265300 | -1.27103400 | 2.05593700  |
| C         | 0.04284300  | 0.61428900  | 0.67842900  | C | -4.80769600 | 0.14261400  | 0.24314500  |
| H         | -0.06172600 | 1.04430100  | 1.68374000  | H | -6.02584400 | 0.61436700  | -2.19884800 |
| H         | 0.30322900  | -0.45397200 | 0.79929500  | H | -8.26619700 | -0.08241900 | -2.91852300 |
| N         | 1.11753500  | 1.35689900  | 0.07218600  | C | -4.28810900 | -0.45167800 | 1.33473900  |
| C         | 1.80682700  | 0.75711600  | -1.05478800 | C | -5.02234700 | -1.52578400 | 2.09807900  |
| H         | 2.46030600  | 1.54076100  | -1.44715900 | H | -3.30046200 | -0.15159000 | 1.67173800  |
| H         | 1.07777900  | 0.48178100  | -1.83293400 | H | -4.67610700 | -1.56264700 | 3.13821200  |
| C         | 2.65415700  | -0.46749900 | -0.72181000 | H | -7.08902900 | -2.11356300 | 2.48426700  |
| C         | 3.76582200  | -0.33471300 | 0.12917700  | H | -4.79824300 | -2.51516600 | 1.66472900  |
| C         | 2.35790700  | -1.73373200 | -1.23993000 | C | -4.06011600 | 1.22792100  | -0.51565900 |
| C         | 4.55301800  | -1.44207900 | 0.44202000  | H | -4.16743900 | 1.03574400  | -1.60273600 |
| H         | 3.98259700  | 0.65514100  | 0.52474900  | H | -4.61900500 | 2.17251700  | -0.35225600 |
| C         | 3.14546100  | -2.84682100 | -0.92568200 | N | -2.67438400 | 1.41577500  | -0.13508800 |
| H         | 1.49811200  | -1.84931300 | -1.89868600 | C | -2.17913700 | 2.68097800  | -0.65117800 |
| C         | 4.24784400  | -2.70350200 | -0.08314400 | H | -2.86629800 | 3.49408200  | -0.33636300 |
| H         | 5.41284600  | -1.32319500 | 1.09892600  | H | -2.16792900 | 2.73654300  | -1.76093100 |
| H         | 2.89405300  | -3.82343500 | -1.33607000 | C | -0.79094100 | 3.03801800  | -0.14886100 |
| H         | 4.86420500  | -3.56569700 | 0.16496400  | C | -0.49610000 | 2.99447700  | 1.22289200  |
| C         | 1.83717300  | 2.35610800  | 0.89568400  | C | 0.21202300  | 3.46044000  | -1.02914400 |
| O         | 2.92520700  | 2.74922900  | 0.40491100  | C | 0.76156700  | 3.36409700  | 1.69798100  |
| O         | 1.25975900  | 2.67805500  | 1.9566780   | H | -1.26957600 | 2.66118600  | 1.90874000  |
| <b>29</b> |             |             |             | C | 1.47435900  | 3.83738300  | -0.55999000 |
| Cu        | -1.51263900 | -0.02578900 | -0.23540100 | H | -0.00115400 | 3.49894800  | -2.09547600 |
| C         | -8.74009300 | -1.06598100 | -1.05823700 | C | 1.75446600  | 3.79074400  | 0.80808400  |
| C         | -8.27462400 | -1.38222300 | 0.22052700  | H | 0.96607100  | 3.33420300  | 2.76598100  |
| C         | -7.00694000 | -0.98672800 | 0.64721000  | H | 2.23116100  | 4.18232500  | -1.26186300 |
| C         | -6.16093800 | -0.25719600 | -0.22648000 | H | 2.72555500  | 4.10980600  | 1.18193300  |
| C         | -6.64825900 | 0.05763800  | -1.50672500 | O | 1.36434600  | 0.07930500  | -0.14696100 |
| C         | -7.92082900 | -0.33958300 | -1.92019400 | C | 2.01654300  | -2.19401200 | -0.18372700 |
| H         | -6.75374000 | -0.39414100 | 2.68591200  | C | 3.36592700  | -1.87206800 | -0.13138500 |
|           |             |             |             | C | 1.68347000  | -3.55560700 | -0.24250900 |

|                    |             |             |             |   |             |             |             |
|--------------------|-------------|-------------|-------------|---|-------------|-------------|-------------|
| C                  | 4.39230800  | -2.80030900 | -0.13559000 | H | -4.15738600 | -2.39462500 | 1.75019100  |
| C                  | 2.68236900  | -4.52540000 | -0.24429600 | C | -4.26951500 | 1.50972900  | -0.25566000 |
| C                  | 4.02707900  | -4.15140900 | -0.19062300 | H | -4.60210300 | 1.52817400  | -1.30850800 |
| H                  | 5.43625600  | -2.52235000 | -0.09670400 | H | -4.80268100 | 2.36128700  | 0.21215800  |
| H                  | 2.41419500  | -5.57646700 | -0.28850900 | N | -2.83988800 | 1.73394400  | -0.19545200 |
| H                  | 4.80829800  | -4.90586300 | -0.18992800 | C | -2.49876400 | 3.11277900  | -0.49207900 |
| H                  | 0.63154500  | -3.81720400 | -0.28613900 | H | -3.09899600 | 3.78725200  | 0.14962500  |
| I                  | 3.71199800  | 0.30981800  | -0.05247300 | H | -2.78133100 | 3.37798300  | -1.53170500 |
| C                  | 5.98691800  | 0.07560300  | 0.03137100  | C | -1.03264500 | 3.43702700  | -0.29452400 |
| F                  | 6.46659700  | 1.32132800  | 0.09025500  | C | -0.49972900 | 3.54527400  | 0.99817400  |
| F                  | 6.47799900  | -0.53072900 | -1.05510900 | C | -0.18645800 | 3.65837400  | -1.38769800 |
| F                  | 6.38849300  | -0.59964400 | 1.11336700  | C | 0.84263800  | 3.86833600  | 1.19294600  |
| C                  | 0.96129700  | -1.12823800 | -0.18424100 | H | -1.14738900 | 3.37745100  | 1.85487200  |
| O                  | -0.24633100 | -1.47280200 | -0.22967300 | C | 1.15954800  | 3.98231400  | -1.19885400 |
| <b>MECP(29-30)</b> |             |             |             | H | -0.58885300 | 3.58388900  | -2.39539900 |
| Cu                 | -1.61835400 | 0.35643200  | -0.22558500 | C | 1.67643100  | 4.09099200  | 0.09345700  |
| C                  | -8.26652400 | -1.83282800 | -1.01329900 | H | 1.23698100  | 3.95458700  | 2.20243500  |
| C                  | -7.76893700 | -2.05881300 | 0.27223400  | H | 1.79947900  | 4.15837000  | -2.05985500 |
| C                  | -6.64120500 | -1.38478700 | 0.74000700  | H | 2.71912500  | 4.36103700  | 0.24393000  |
| C                  | -5.97529800 | -0.45300800 | -0.09756100 | O | 1.19069900  | 0.25508400  | 0.14625900  |
| C                  | -6.49016900 | -0.23908300 | -1.38713500 | C | 1.74162800  | -1.99928400 | -0.36873100 |
| C                  | -7.62147700 | -0.91760300 | -1.84240100 | C | 3.11241100  | -1.83237900 | -0.18711100 |
| H                  | -6.55887800 | -0.81170000 | 2.80043300  | C | 1.29221400  | -3.28881000 | -0.69490800 |
| H                  | -9.14486000 | -2.37006800 | -1.36135100 | C | 4.03087300  | -2.86745000 | -0.29453500 |
| H                  | -8.26612400 | -2.77213700 | 0.92692800  | C | 2.18535500  | -4.34862400 | -0.82119200 |
| C                  | -6.13522400 | -1.59440100 | 2.15063600  | C | 3.55065500  | -4.13994900 | -0.61863300 |
| C                  | -4.76081100 | 0.23536400  | 0.41723200  | H | 5.08809500  | -2.71521100 | -0.12718000 |
| H                  | -6.00184900 | 0.45834700  | -2.05946900 | H | 1.81823000  | -5.33919400 | -1.07229600 |
| H                  | -7.99196400 | -0.72943200 | -2.84664600 | H | 4.25417600  | -4.96272100 | -0.70863100 |
| C                  | -4.13168200 | -0.26107700 | 1.50130900  | H | 0.22599600  | -3.42645400 | -0.83806900 |
| C                  | -4.60736500 | -1.50169600 | 2.21411500  | I | 3.80031300  | 0.18066800  | 0.29690300  |
| H                  | -3.24264000 | 0.24043500  | 1.87459600  | C | 6.26807700  | -0.36555400 | 0.08425000  |
| H                  | -4.27186200 | -1.49591900 | 3.25785100  | F | 6.87891000  | 0.79502700  | 0.33520100  |
| H                  | -6.48985100 | -2.55423300 | 2.54446800  | F | 6.58376800  | -0.78138700 | -1.14434800 |

|           |             |             |             |   |             |             |             |
|-----------|-------------|-------------|-------------|---|-------------|-------------|-------------|
| F         | 6.67617400  | -1.28172900 | 0.97269400  | C | 0.44514700  | 3.81577700  | 2.49115700  |
| C         | 0.75780600  | -0.87282200 | -0.18987800 | H | -1.11165900 | 2.32780800  | 2.56159700  |
| O         | -0.47083500 | -1.14833100 | -0.38713400 | C | 0.56200800  | 5.12544500  | 0.46346800  |
| <b>30</b> |             |             |             | H | -0.90301000 | 4.65453800  | -1.04581200 |
| Cu        | -0.08420900 | 0.97508900  | -0.76476700 | C | 1.04913700  | 4.82470700  | 1.73745900  |
| C         | -7.27166400 | -2.26038300 | -1.21619500 | H | 0.81763100  | 3.57913300  | 3.48405600  |
| C         | -6.81204300 | -2.27357700 | 0.10348700  | H | 1.02472800  | 5.91235100  | -0.12600800 |
| C         | -5.61946400 | -1.64387500 | 0.45804100  | H | 1.89350100  | 5.37592200  | 2.14231500  |
| C         | -4.85709200 | -0.98006400 | -0.53349300 | O | 1.45720500  | -0.08502700 | 0.05375100  |
| C         | -5.33172500 | -0.97193800 | -1.85511800 | C | 3.61251100  | -0.11455400 | -1.05801400 |
| C         | -6.52743000 | -1.60605400 | -2.19628600 | C | 4.26253600  | -1.13618800 | -0.34491200 |
| H         | -5.48966900 | -0.66282800 | 2.35401500  | C | 4.37534000  | 0.63975000  | -1.97045500 |
| H         | -8.20201500 | -2.75937700 | -1.47369700 | C | 5.62437300  | -1.38162100 | -0.53682200 |
| H         | -7.39084400 | -2.78081300 | 0.87255700  | C | 5.73193900  | 0.40603200  | -2.15902500 |
| C         | -5.14104700 | -1.60123900 | 1.89360800  | C | 6.35891100  | -0.60897300 | -1.43630300 |
| C         | -3.57864700 | -0.33727500 | -0.14491000 | H | 6.11257300  | -2.17737100 | 0.01465900  |
| H         | -4.76005800 | -0.47947600 | -2.63597400 | H | 6.29449300  | 1.00929900  | -2.86551900 |
| H         | -6.87076900 | -1.59064900 | -3.22719900 | H | 7.41854700  | -0.80948000 | -1.56994900 |
| C         | -2.99374500 | -0.65629700 | 1.02433400  | H | 3.86211000  | 1.41815700  | -2.52370000 |
| C         | -3.61065700 | -1.64507200 | 1.98079700  | I | 3.29200500  | -2.47188700 | 1.04566900  |
| H         | -2.02770800 | -0.22792500 | 1.27743100  | C | 2.17252800  | 0.27222400  | -0.93255700 |
| H         | -3.28545700 | -1.43884900 | 3.00720800  | O | 1.64924100  | 1.01150900  | -1.83482300 |
| H         | -5.58890600 | -2.41790900 | 2.47118800  |   |             |             |             |
| H         | -3.24667300 | -2.65798200 | 1.74250800  |   |             |             |             |
| C         | -2.93640500 | 0.62528400  | -1.14442100 |   |             |             |             |
| H         | -2.56377000 | 0.05131900  | -2.00279000 |   |             |             |             |
| H         | -3.71839600 | 1.29609100  | -1.53640700 |   |             |             |             |
| N         | -1.83751900 | 1.42557000  | -0.61991500 |   |             |             |             |
| C         | -2.28654100 | 2.60923200  | 0.11408500  |   |             |             |             |
| H         | -2.97468100 | 2.29591900  | 0.91478500  |   |             |             |             |
| H         | -2.87585700 | 3.24434900  | -0.56833100 |   |             |             |             |
| C         | -1.13569900 | 3.40053700  | 0.69179200  |   |             |             |             |
| C         | -0.64127800 | 3.11064900  | 1.97097400  |   |             |             |             |
| C         | -0.52386600 | 4.41736900  | -0.05422100 |   |             |             |             |
